# Supplementary material for: Spectroscopic and ab initio investigation of 2,6-difluorophenylacetylene–amine complexes: coexistence of C–H⋯N and lone-pair⋯π complexes and intermolecular coulombic decay
Source: Royal Society of Chemistry journal article supplement (doi:10.1039/c4cp03445g), 2014-10-31
Supplement: c4cp03445g1.pdf [file c4cp03445g1.pdf]

Electronic Supplementary Information for

**Spectroscopic and *Ab-Initio* Investigation of 2,6-Difluorophenylacetylene-Amine Complexes: Coexistence of C–H⋯N and Lone-pair⋯ $\pi$  Complexes and Intermolecular Columbic Decay**

**Sohidul Islam Mondal, Arghya Dey, Saumik Sen and G. Naresh Patwari\***

Department of Chemistry, Indian Institute of Technology Bombay, Powai, Mumbai 400 076  
India E-mail: naresh@chem.iitb.ac.in

**Debashree Ghosh\***

Physical and Materials Chemistry Division, CSIR-National Chemical Laboratory, Dr. Homi Bhabha Road, Pune 411 008 India. E-mail: debashree.ghosh@gmail.com

**Additional Computational Methods**

The interaction between DFPHA and TMA was analysed by the topographical study of electron density using the atoms in molecules (AIM)<sup>1</sup> approach using AIM2000 package.<sup>2</sup> Further, the analysis of the stabilization energies of various structures of DFPHA-TMA complex was carried out using Symmetry Adapted Perturbation Theory (SAPT).<sup>3</sup> The simplest of SAPT approach. i.e. SAPT0 with cc-pVTZ basis set along with the cc-pVTZ-JKFIT basis for the Hartree-Fock and cc-pVTZ-RI basis for the SAPT procedure.<sup>4</sup> The density fitting approach was used to reduce the computational expense. The main advantage of SAPT calculations is that it allows for the separation of interaction energy ( $E_{\text{SAPT0}}$ ) into physically well-defined components, such as those arising from the electrostatic ( $E_{\text{elec}}$ ), induction ( $E_{\text{ind}}$ ) dispersion ( $E_{\text{disp}}$ ) and exchange ( $E_{\text{exch}}$ ) as given in equation (1)

$$E_{\text{SAPT0}} = E_{\text{elec}}^{(10)} + E_{\text{exch}}^{(10)} + E_{\text{ind}}^{(20)} + E_{\text{exch-ind}}^{(20)} + E_{\text{disp}}^{(20)} + E_{\text{exch-disp}}^{(20)} \quad (1)$$

The perturbative method SAPT0 treats the monomers at the Hartree–Fock level and then dissociates the overall intermolecular interaction energy into the different components using second-order perturbation theory. It has been found that the SAPT0 calculations with reasonable basis sets provide good estimates of stabilization energies.<sup>4</sup> Further, the charge transfer component is given by the equations (2) and (3).<sup>5</sup>

$$E_{\text{Ct}}^{(20)} = E_{\text{Ind}}^{(20)}(\text{dimer}) - E_{\text{Ind}}^{(20)}(\text{monomer}) \quad (2)$$

$$E_{\text{Exch-Ct}}^{(20)} = E_{\text{Exch-Ind}}^{(20)}(\text{dimer}) - E_{\text{Exch-Ind}}^{(20)}(\text{monomer}) \quad (3)$$

In the present analysis the exchange-induction and exchange-dispersion terms will be included to the parent induction and dispersion terms. Even in the case of charge transfer component the difference in the exchange induction term between the dimer and monomer basis is added to the parent charge transfer term. SAPT calculations were carried out using PSI4 *ab-Initio* package.<sup>6</sup>

The stabilization energies of various structures of DFPHA-TMA complex were calculated at MP2/CBS and CCSD(T)/CBS method using extrapolations method proposed by Helgaker co-workers<sup>7</sup> and are listed in Table S2. Three sets of MP2/CBS and CCSD(T)/CBS extrapolations were carried out. (i) With MP2/aug-cc-pVDZ, MP2/aug-cc-pVTZ (aVTZ) and CCSD(T)/aug-cc-pVDZ energies (Ref. 8) for the geometries obtained at MP2/cc-pVDZ level. (ii) With MP2/cc-pVDZ, MP2/cc-pVTZ and CCSD(T)/cc-pVDZ energies for the geometries

obtained at MP2/cc-pVTZ level. (iii) With MP2/cc-pVDZ (0.25,15), MP2/cc-pVTZ and CCSD(T)/cc-pVDZ (0.25,15) energies for the geometries obtained at MP2/cc-pVTZ level. However, the extrapolations with cc-pVDZ (0.25,0.15) have not benchmarked with molecules containing fluorine (Ref. 9), hence the confidence level on these values is low. Since the intermolecular structures calculated at MP2/cc-pVDZ and MP2/cc-pVTZ are almost identical the best estimates for the stabilization energies are from set 1.

## References

- 1 R. F. Bader, *Atoms in Molecules: A Quantum Theory*, Oxford University Press: Oxford, U.K., 1990.
- 2 F. Biegler-Konieg, J. Schonbohm and D. Bayles, *J. Comput. Chem.* 2001, **22**, 545-559.
- 3 (a) B. Jeziorski, R. Moszynski and K. Szalewicz, *Chem. Rev.* 1994, **94**, 1887-1930. (b) K. Szalewicz, *WIREs: Comput. Mol. Sci.*, 2012, **2**, 254-272.
- 4 E. G. Hohenstein, C. D. Sherrill, *J. Chem. Phys.* 2010, **132**, 184111.
- 5 A. J. Stone and A. J. Misquitta, *Chem. Phys. Lett.*, 2009, **473**, 201-205.
- 6 (a) J. M. Turney, A. C. Simmonett, R. M. Parrish, E. G. Hohenstein, F. A. Evangelista, J. T. Fermann, B. J. Mintz, L. A. Burns, J. J. Wilke, M. L. Abrams, N. J. Russ, M. L. Leininger, C. L. Janssen, E. T. Seidl, W. D. Allen, H. F. Schaefer, R. A. King, E. F. Valeev, C. D. Sherrill and T. D. Crawford, *WIREs: Comput. Mol. Sci.*, 2012, **2**, 556-565. (b) T. M. Parker, L. A. Burns, R. M. Parrish, A. G. Ryno and C. D. Sherrill, *J. Chem. Phys.* 2014, **140**, 094106
- 7 A. Halkier, T. Helgaker, P. Jorgensen, W. Klopper, H. Koch, J. Olsen and A. K. Wilson, *Chem. Phys. Lett.*, 1998, **286**, 243-252.
- 8 (a) S. J. Grabowski, W. A. Sokalski and J. Leszczynski *J. Phys. Chem. A*, 2005, **109**, 4331-4341. (b) K. Berka, R. Laskowski, K. E. Riley, P. Hobza and J. Vondrasek, *J. Chem. Theory Comput.*, 2009, **5**, 982-992. (c) A. Bhattacharjee, Y. Matsuda, A. Fujii and S. Wategaonkar, *ChemPhysChem*, 2013, **14**, 905-914.
- 9 P. Jurecka and P. Hobza, *J. Am. Chem. Soc.* 2003, **125**, 15608-15613.

**TABLE S1. ZPE and BSSE corrected energies (kJ mol<sup>-1</sup>) for the low energy structures of DFPHA-TMA complex calculated at various levels of theory. The ZPE was calculated at MP2/cc-pVDZ level.**

| Structure      | MP2     | MP2                  | MP2     | $\omega$ B97X-D | B2PLYP-D | B2PLYP-D3 |
|----------------|---------|----------------------|---------|-----------------|----------|-----------|
|                | cc-pVDZ | cc-pVTZ<br>//cc-pVDZ | cc-pVTZ | cc-pVTZ         | cc-pVTZ  | cc-pVTZ   |
| S <sub>1</sub> | -12.1   | -14.8                | -14.5   | -17.4           | -15.5    | -15.1     |
| S <sub>2</sub> | -7.9    | -10.9                | -11.8   | -13.9           | -12.8    | -12.0     |
| S <sub>3</sub> | -7.6    | -12.5                | -12.7   | -15.5           | -14.6    | -13.1     |
| S <sub>4</sub> | -4.4    | -15.4                | -15.8   | -17.9           | -14.9    | -14.2     |
| S <sub>5</sub> | -4.1    | -16.2                | -16.6   | -18.8           | -15.5    | -14.7     |
| S <sub>6</sub> | -2.8    | -10.6                | -10.6   | -13.7           | -9.3     | -9.00     |
| S <sub>7</sub> | -4.0    | -11.0                | -11.1   | -13.2           | -10.5    | -9.85     |
| S <sub>8</sub> | -2.8    | -7.4                 | -9.3    | -9.7            | -8.7     | -8.2      |

**TABLE S2. ZPE and BSSE corrected CBS extrapolated stabilization energies (kJ mol<sup>-1</sup>) for the low energy structures of DFPHA-TMA complex.**

| Structure | MP2/CBS <sup>a</sup> | MP2/CBS <sup>b</sup> | MP2/CBS <sup>c</sup> | CCSDT/CBS <sup>a</sup> | CCSDT/CBS <sup>b</sup> | CCSDT/CBS <sup>c</sup> |
|-----------|----------------------|----------------------|----------------------|------------------------|------------------------|------------------------|
| <b>S1</b> | -19.1                | -16.9                | -16.4                | -17.2                  | -14.8                  | -14.5                  |
| <b>S2</b> | -13.7                | -13.9                | -12.6                | -12.9                  | -12.3                  | -11.5                  |
| <b>S3</b> | -16.8                | -15.2                | -13.7                | -15.3                  | -13.5                  | -12.9                  |
| <b>S4</b> | -22.1                | -20.5                | -16.8                | -15.7                  | -15.1                  | -11.9                  |
| <b>S5</b> | -22.9                | -21.7                | -18.0                | -15.9                  | -16.3                  | -12.8                  |
| <b>S6</b> | -15.1                | -14.0                | -11.3                | -11.4                  | -10.43                 | -8.5                   |
| <b>S7</b> | -15.2                | -14.3                | -11.8                | -11.7                  | -10.93                 | -9.0                   |
| <b>S8</b> | -10.2                | -11.8                | -9.9                 | -7.9                   | -9.15                  | -7.6                   |

<sup>a</sup> aug-cc-pVNZ (N=D,T) basis with MP2/cc-pVDZ optimized geometries.

<sup>b</sup> cc-pVNZ (N=D,T) basis with MP2/cc-pVDZ optimized geometries

<sup>c</sup> cc-pVNZ(0.25,0.15) (C,N,F and H) (N=D,T) basis with MP2/cc-pVTZ optimized geometry.

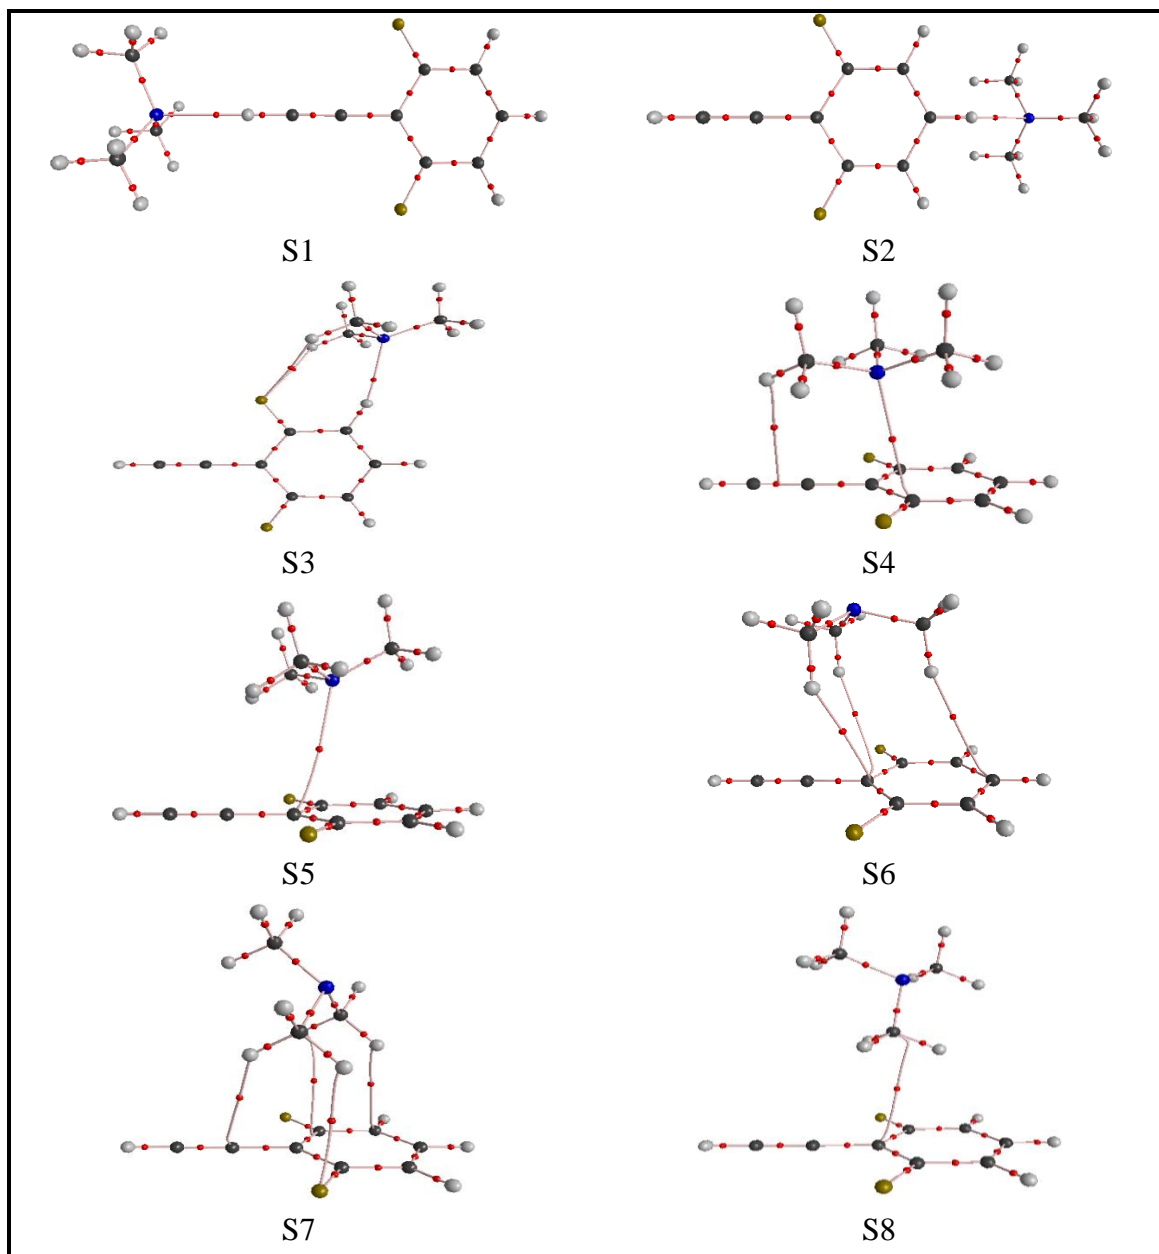

**Fig S1.** Molecular graphs of various structures of DFPHA-TMA complex calculated for B2PLYPD3/cc-pVTZ level.

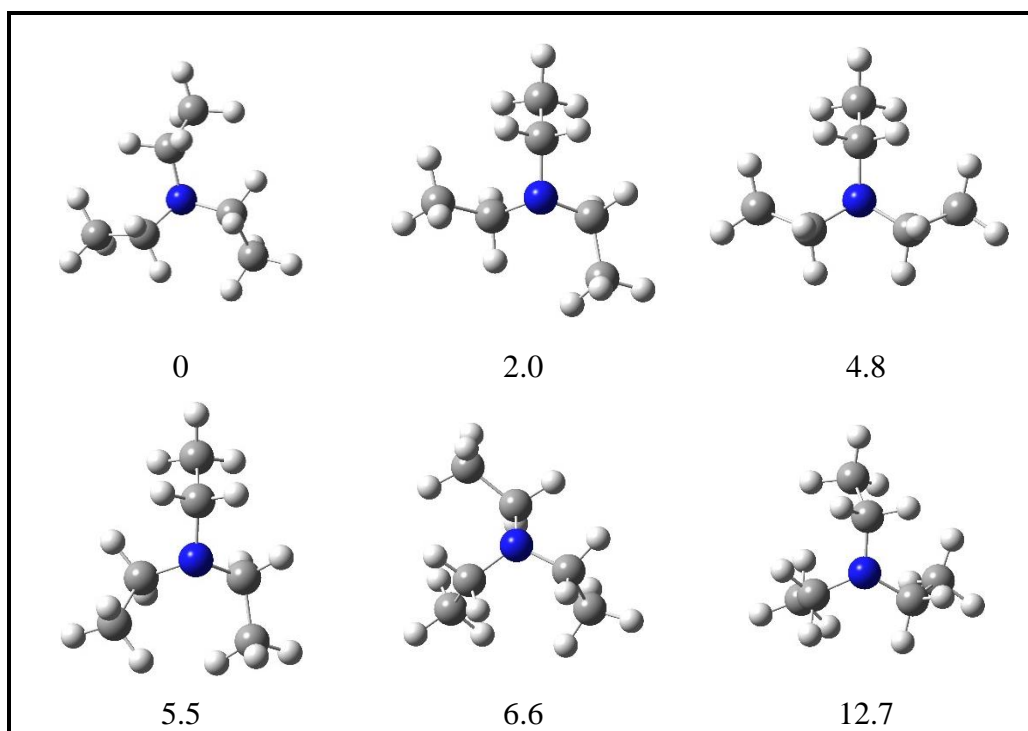

**Fig S2.** Various conformation of TEA optimized at B3LYP/cc-pVTZ level. Relative energies ( $\text{kJ mol}^{-1}$ ) are given against each structure. Since the experiments were carried out under jet-cooled conditions only the lowest energy structure was considered for calculation of DFPHA-TEA complex.

**Optimized coordinates of various structures of DFPHA-TEA complex calculated at various levels of theory viz. MP2/cc-pVDZ, MP2/cc-pVTZ,  $\omega$ B97X-D/cc-pVTZ, B2PLYP-D/cc-pVTZ and B2PLYP-D3/cc-pVTZ**

**S1-MP2/cc-pVDZ**

|   |             |             |             |
|---|-------------|-------------|-------------|
| C | -1.72361400 | 0.00042400  | -0.00016800 |
| C | -2.46537700 | -1.19968100 | -0.00005400 |
| C | -3.86176500 | -1.22047000 | 0.00015200  |
| C | -4.55853100 | -0.00109900 | 0.00025700  |
| C | -3.86307400 | 1.21901800  | 0.00015600  |
| C | -2.46666300 | 1.19973300  | -0.00005100 |
| C | -0.29096500 | 0.00117400  | -0.00039100 |
| C | 0.94532300  | 0.00177100  | -0.00056700 |
| F | -1.79084700 | -2.36394000 | -0.00014900 |

|   |             |             |             |
|---|-------------|-------------|-------------|
| F | -1.79338700 | 2.36471100  | -0.00014000 |
| H | -4.37988600 | -2.18277500 | 0.00022800  |
| H | -5.65258500 | -0.00168600 | 0.00041700  |
| H | -4.38222800 | 2.18076600  | 0.00023600  |
| H | 2.03719200  | 0.00219400  | -0.00077400 |
| N | 4.13728500  | 0.00042000  | -0.00003200 |
| C | 4.60767300  | 1.33553700  | -0.35764500 |
| H | 4.22713100  | 1.60687100  | -1.35555600 |
| H | 4.22698200  | 2.06938800  | 0.37091100  |
| H | 5.71937400  | 1.40111500  | -0.37515800 |
| C | 4.60386000  | -0.97836500 | -0.97775000 |
| H | 4.22031100  | -1.97702400 | -0.71347600 |
| H | 4.22335000  | -0.71305500 | -1.97729700 |
| H | 5.71536600  | -1.02983400 | -1.02665300 |
| C | 4.60372300  | -0.35848500 | 1.33609100  |
| H | 4.22311600  | 0.37098000  | 2.06909800  |
| H | 4.22023500  | -1.35556900 | 1.60635300  |
| H | 5.71522000  | -0.37859400 | 1.40431900  |

### S1-MP2/cc-pVTZ

|   |             |             |             |
|---|-------------|-------------|-------------|
| C | -1.70276000 | 0.00127900  | -0.00073700 |
| C | -2.44051100 | -1.18790400 | 0.00008500  |
| C | -3.82439900 | -1.21157200 | 0.00164100  |
| C | -4.51617700 | -0.00328400 | 0.00242900  |
| C | -3.82831900 | 1.20724000  | 0.00166200  |
| C | -2.44435900 | 1.18806600  | 0.00010900  |
| C | -0.28396200 | 0.00354200  | -0.00237100 |
| C | 0.93496300  | 0.00536000  | -0.00364000 |
| F | -1.76992500 | -2.34591100 | -0.00065500 |
| F | -1.77753600 | 2.34823100  | -0.00061800 |
| H | -4.33559900 | -2.16247400 | 0.00221300  |
| H | -5.59652800 | -0.00503400 | 0.00364000  |

|   |             |             |             |
|---|-------------|-------------|-------------|
| H | -4.34259800 | 2.15648000  | 0.00224800  |
| H | 2.01265100  | 0.00683100  | -0.00485700 |
| N | 4.11521500  | 0.00226900  | -0.00177300 |
| C | 4.58832100  | 1.32987000  | -0.35641400 |
| H | 4.21776000  | 1.59893700  | -1.34403400 |
| H | 4.21376300  | 2.05631000  | 0.36268300  |
| H | 5.68720100  | 1.38695700  | -0.36918700 |
| C | 4.57785600  | -0.97408000 | -0.97378000 |
| H | 4.19536300  | -1.95951000 | -0.71347800 |
| H | 4.20744600  | -0.70996000 | -1.96280100 |
| H | 5.67623300  | -1.02657500 | -1.01578400 |
| C | 4.57288600  | -0.35677000 | 1.33001900  |
| H | 4.19864300  | 0.36599000  | 2.05299900  |
| H | 4.19056400  | -1.34085500 | 1.59563200  |
| H | 5.67102500  | -0.37990900 | 1.39712600  |

**S1- $\omega$ B97X-D/cc-pVTZ**

|   |             |             |             |
|---|-------------|-------------|-------------|
| C | -1.68846600 | 0.00042700  | -0.00056400 |
| C | -2.42638500 | -1.18290400 | 0.00151700  |
| C | -3.80527800 | -1.20507900 | 0.00248900  |
| C | -4.49039500 | -0.00099700 | 0.00136900  |
| C | -3.80649700 | 1.20377800  | -0.00070600 |
| C | -2.42758200 | 1.18301200  | -0.00162700 |
| C | -0.26599500 | 0.00112300  | -0.00153600 |
| C | 0.93253500  | 0.00147500  | -0.00235600 |
| F | -1.76457700 | -2.33800300 | 0.00260800  |
| F | -1.76695400 | 2.33877700  | -0.00358900 |
| H | -4.31903100 | -2.15463800 | 0.00410400  |
| H | -5.57104400 | -0.00154300 | 0.00211000  |
| H | -4.32121500 | 2.15281600  | -0.00161100 |
| H | 2.01052000  | 0.00174900  | -0.00290400 |
| N | 4.13641300  | 0.00026800  | -0.00068000 |

|   |            |             |             |
|---|------------|-------------|-------------|
| C | 4.57013200 | 1.33593900  | -0.35868300 |
| H | 4.18429000 | 1.59798800  | -1.34384800 |
| H | 4.18132200 | 2.05600000  | 0.36132700  |
| H | 5.66809600 | 1.42929800  | -0.38190500 |
| C | 4.56763100 | -0.97943800 | -0.97765600 |
| H | 4.17702500 | -1.96196600 | -0.71277300 |
| H | 4.18182900 | -0.71405800 | -1.96195300 |
| H | 5.66541700 | -1.05095900 | -1.04498700 |
| C | 4.56420200 | -0.35782800 | 1.33684500  |
| H | 4.17564600 | 0.36454500  | 2.05469400  |
| H | 4.17384000 | -1.34129400 | 1.59861500  |
| H | 5.66174200 | -0.38496300 | 1.43405600  |

### **S1-B2PLYP-D/cc-pVTZ**

|   |             |             |             |
|---|-------------|-------------|-------------|
| C | -1.68644000 | 0.00058300  | -0.00021500 |
| C | -2.42936200 | -1.18578200 | -0.00030500 |
| C | -3.81183900 | -1.20943400 | 0.00000500  |
| C | -4.50138900 | -0.00139700 | 0.00044000  |
| C | -3.81353800 | 1.20760800  | 0.00056400  |
| C | -2.43102700 | 1.18590400  | 0.00023800  |
| C | -0.26728300 | 0.00155900  | -0.00056000 |
| C | 0.94132800  | 0.00232600  | -0.00081000 |
| F | -1.76368500 | -2.34821000 | -0.00071300 |
| F | -1.76698800 | 2.34926100  | 0.00037000  |
| H | -4.32278400 | -2.15957300 | -0.00009300 |
| H | -5.58104800 | -0.00215600 | 0.00068700  |
| H | -4.32581700 | 2.15702800  | 0.00090600  |
| H | 2.01802700  | 0.00279700  | -0.00102900 |
| N | 4.11837800  | 0.00057200  | -0.00018400 |
| C | 4.57097900  | 1.33538500  | -0.35774700 |
| H | 4.19115300  | 1.59888600  | -1.34393800 |
| H | 4.19066800  | 2.05669400  | 0.36429600  |



|   |            |             |             |
|---|------------|-------------|-------------|
| H | 5.66971500 | 1.40830600  | -0.37701600 |
| C | 4.56632300 | -0.97837700 | -0.97762200 |
| H | 4.18245500 | -1.96259300 | -0.71258000 |
| H | 4.18668000 | -0.71197600 | -1.96311500 |
| H | 5.66480000 | -1.03613300 | -1.03178100 |
| C | 4.56582200 | -0.35836100 | 1.33596400  |
| H | 4.18577600 | 0.36508200  | 2.05602900  |
| H | 4.18205100 | -1.34333100 | 1.59834600  |
| H | 5.66426500 | -0.38114100 | 1.41221800  |

### **S1-B2PLYP-D3/cc-pVTZ**

|   |             |             |             |
|---|-------------|-------------|-------------|
| C | -1.69412500 | 0.00068100  | -0.00026800 |
| C | -2.43575200 | -1.18549200 | -0.00044700 |
| C | -3.81758600 | -1.20923000 | -0.00000600 |
| C | -4.50667900 | -0.00165700 | 0.00065300  |
| C | -3.81959300 | 1.20705900  | 0.00086400  |
| C | -2.43771900 | 1.18562200  | 0.00040300  |
| C | -0.27556000 | 0.00183300  | -0.00077300 |
| C | 0.93264200  | 0.00278500  | -0.00117300 |
| F | -1.76808700 | -2.34654500 | -0.00107500 |
| F | -1.77198600 | 2.34777600  | 0.00061200  |
| H | -4.32914500 | -2.15882900 | -0.00018000 |
| H | -5.58616700 | -0.00255300 | 0.00100300  |
| H | -4.33272800 | 2.15580700  | 0.00137400  |
| H | 2.00800400  | 0.00347300  | -0.00142200 |
| N | 4.13244400  | 0.00075800  | -0.00031900 |
| C | 4.57991100  | 1.33715300  | -0.35843800 |
| H | 4.19779000  | 1.60071100  | -1.34305000 |
| H | 4.19704700  | 2.05789000  | 0.36190100  |
| H | 5.67730100  | 1.41936900  | -0.38004200 |
| C | 4.57440000  | -0.97984200 | -0.97883300 |
| H | 4.18732400  | -1.96235500 | -0.71465600 |

|   |            |             |             |
|---|------------|-------------|-------------|
| H | 4.19249200 | -0.71426400 | -1.96299500 |
| H | 5.67144100 | -1.04526800 | -1.03981000 |
| C | 4.57353100 | -0.35866600 | 1.33781500  |
| H | 4.19095600 | 0.36356900  | 2.05682600  |
| H | 4.18655000 | -1.34168700 | 1.60025300  |
| H | 5.67051200 | -0.38457300 | 1.42414100  |

---

**S2-MP2/cc-pVDZ**

|   |             |             |             |
|---|-------------|-------------|-------------|
| C | 2.46790400  | 0.02071700  | -0.00845100 |
| C | 1.85913300  | -1.25122900 | -0.03854300 |
| C | 0.47368500  | -1.41583100 | -0.08820500 |
| C | -0.35209700 | -0.27899100 | -0.10975200 |
| C | 0.21694500  | 1.00602700  | -0.08085300 |
| C | 1.60592600  | 1.13660900  | -0.03133100 |
| C | 3.89258500  | 0.17154000  | 0.04279100  |
| C | 5.11852700  | 0.30146000  | 0.08683300  |
| F | 2.65546600  | -2.33658100 | -0.01781900 |
| F | 2.15595700  | 2.36533000  | -0.00369600 |
| H | 0.06000800  | -2.42750800 | -0.10976800 |
| H | -1.44404200 | -0.38549700 | -0.14627200 |
| H | -0.40043600 | 1.90810300  | -0.09742300 |
| H | 6.18768200  | 0.41454900  | 0.12520800  |
| N | -3.72103000 | -0.06165600 | -0.01192300 |
| C | -3.72109800 | 1.38456000  | 0.17953100  |
| H | -3.08320500 | 1.64395600  | 1.04058600  |
| H | -3.31339000 | 1.87740100  | -0.71848200 |
| H | -4.74217200 | 1.79005700  | 0.36659800  |
| C | -4.23322600 | -0.72472600 | 1.18233400  |
| H | -4.21220200 | -1.81710700 | 1.03823200  |
| H | -3.59590700 | -0.47575000 | 2.04639400  |
| H | -5.27950900 | -0.42363700 | 1.42029600  |
| C | -4.53046300 | -0.41547600 | -1.17276400 |

|   |             |             |             |
|---|-------------|-------------|-------------|
| H | -4.11949800 | 0.06916000  | -2.07312800 |
| H | -4.50575200 | -1.50678400 | -1.32360700 |
| H | -5.59410500 | -0.10205700 | -1.06108700 |

### **S2-MP2/cc-pVTZ**

|   |             |             |             |
|---|-------------|-------------|-------------|
| C | 2.32389500  | 0.03695800  | 0.09959300  |
| C | 1.60996400  | -1.15721200 | 0.24720300  |
| C | 0.27272200  | -1.27299100 | -0.08941700 |
| C | -0.39593100 | -0.16127600 | -0.59793100 |
| C | 0.27579900  | 1.04856200  | -0.76119800 |
| C | 1.61299800  | 1.12715700  | -0.41383900 |
| C | 3.69541100  | 0.13705400  | 0.45180800  |
| C | 4.87045500  | 0.22279400  | 0.75346400  |
| F | 2.25767700  | -2.22198700 | 0.73589000  |
| F | 2.26365500  | 2.28678200  | -0.56880400 |
| H | -0.22455200 | -2.22212100 | 0.04592500  |
| H | -1.44672600 | -0.23346500 | -0.85222400 |
| H | -0.21905000 | 1.92452000  | -1.15397200 |
| H | 5.89609400  | 0.29753500  | 1.01641600  |
| N | -3.68752400 | -0.04512000 | -0.21118100 |
| C | -3.58301500 | 1.32706500  | 0.25448600  |
| H | -2.62310200 | 1.47417500  | 0.74813300  |
| H | -3.64594500 | 2.00853600  | -0.59263400 |
| H | -4.38183000 | 1.58558200  | 0.96669300  |
| C | -3.58572600 | -0.95695900 | 0.91525900  |
| H | -3.65060300 | -1.98530800 | 0.56275800  |
| H | -2.62583000 | -0.81982200 | 1.41180200  |
| H | -4.38465200 | -0.79355100 | 1.65497400  |
| C | -4.94765600 | -0.24447800 | -0.90555100 |
| H | -5.00675700 | 0.42801600  | -1.75940800 |
| H | -5.00897100 | -1.26895600 | -1.26817800 |
| H | -5.81511600 | -0.05485100 | -0.25436800 |

**S2- $\omega$ B97X-D/cc-pVTZ**

|   |             |             |             |
|---|-------------|-------------|-------------|
| C | 2.31535300  | 0.04083200  | 0.10317900  |
| C | 1.59965800  | -1.14575100 | 0.26051300  |
| C | 0.26823800  | -1.26334900 | -0.07698300 |
| C | -0.39123500 | -0.16016900 | -0.59641900 |
| C | 0.27623600  | 1.04225900  | -0.77047400 |
| C | 1.60753800  | 1.12187200  | -0.42153700 |
| C | 3.68890600  | 0.14296100  | 0.45866200  |
| C | 4.84437900  | 0.22887300  | 0.75778300  |
| F | 2.23664200  | -2.20296200 | 0.75959200  |
| F | 2.25221400  | 2.27488600  | -0.58722600 |
| H | -0.23333500 | -2.20853800 | 0.06820100  |
| H | -1.44223400 | -0.23329800 | -0.85069200 |
| H | -0.21893400 | 1.91392100  | -1.17178700 |
| H | 5.86980600  | 0.30494700  | 1.02292500  |
| N | -3.70162700 | -0.04034900 | -0.18296900 |
| C | -3.58601600 | 1.33505900  | 0.25634900  |
| H | -2.62743000 | 1.48389700  | 0.75509000  |
| H | -3.63151100 | 2.00390500  | -0.60349800 |
| H | -4.38622700 | 1.62340200  | 0.95802400  |
| C | -3.58443500 | -0.95724600 | 0.93224100  |
| H | -3.62921100 | -1.98567900 | 0.57294200  |
| H | -2.62570700 | -0.81064800 | 1.43137000  |
| H | -4.38425100 | -0.81960400 | 1.67869300  |
| C | -4.92496800 | -0.26015200 | -0.92579700 |
| H | -4.95986400 | 0.40579400  | -1.78800100 |
| H | -4.95943100 | -1.28776500 | -1.28762200 |
| H | -5.82686700 | -0.08045900 | -0.31686200 |

**S2-B2PLYP-D/cc-pVTZ**

|   |            |            |            |
|---|------------|------------|------------|
| C | 2.33406100 | 0.04574700 | 0.10425700 |
|---|------------|------------|------------|

|   |             |             |             |
|---|-------------|-------------|-------------|
| C | 1.59601900  | -1.12652000 | 0.30472500  |
| C | 0.25597200  | -1.23338000 | -0.01669900 |
| C | -0.39537700 | -0.13240100 | -0.56563800 |
| C | 0.29465200  | 1.05663400  | -0.78388100 |
| C | 1.63404800  | 1.12409200  | -0.44917300 |
| C | 3.70968100  | 0.13587800  | 0.44271200  |
| C | 4.87865100  | 0.21241400  | 0.73028400  |
| F | 2.22442100  | -2.18520800 | 0.83311900  |
| F | 2.29974600  | 2.26772700  | -0.65845000 |
| H | -0.25636500 | -2.16600400 | 0.16237400  |
| H | -1.44724800 | -0.19827000 | -0.81101200 |
| H | -0.18696200 | 1.92424400  | -1.20773800 |
| H | 5.90642500  | 0.27963500  | 0.98281200  |
| N | -3.70167000 | -0.05236000 | -0.21037100 |
| C | -3.60686800 | 1.32620900  | 0.24055600  |
| H | -2.64563500 | 1.48653400  | 0.72808700  |
| H | -3.68032500 | 1.99815400  | -0.61390400 |
| H | -4.40500800 | 1.58588300  | 0.95441800  |
| C | -3.57692100 | -0.96431400 | 0.91459700  |
| H | -3.62602000 | -1.99353500 | 0.56049800  |
| H | -2.61666400 | -0.81016300 | 1.40595300  |
| H | -4.37490100 | -0.81662400 | 1.65991300  |
| C | -4.94759200 | -0.27862500 | -0.92327800 |
| H | -5.00678300 | 0.39009700  | -1.78092700 |
| H | -4.98432500 | -1.30647000 | -1.28167900 |
| H | -5.82932600 | -0.10273600 | -0.28585600 |

**S2-B2PLYP-D3/cc-pVTZ**

|   |             |             |             |
|---|-------------|-------------|-------------|
| C | 2.37569300  | 0.03709400  | 0.08260800  |
| C | 1.64536300  | -1.14133700 | 0.26917700  |
| C | 0.29560600  | -1.23836500 | -0.00907600 |
| C | -0.37339700 | -0.12039400 | -0.49763000 |

|   |             |             |             |
|---|-------------|-------------|-------------|
| C | 0.30876400  | 1.07540100  | -0.69957700 |
| C | 1.65829600  | 1.13260500  | -0.40943500 |
| C | 3.76169300  | 0.11669000  | 0.37567000  |
| C | 4.93979900  | 0.18433600  | 0.62464800  |
| F | 2.29307600  | -2.21552900 | 0.73968000  |
| F | 2.31869600  | 2.28209600  | -0.60260200 |
| H | -0.21104700 | -2.17643300 | 0.15603300  |
| H | -1.43323400 | -0.17794600 | -0.70924100 |
| H | -0.18749700 | 1.95584100  | -1.07703500 |
| H | 5.97537900  | 0.24374800  | 0.84326300  |
| N | -3.71549800 | -0.03486200 | -0.16626100 |
| C | -3.68902900 | 1.33744900  | 0.31178100  |
| H | -2.78810000 | 1.50429000  | 0.90036800  |
| H | -3.67859800 | 2.02197200  | -0.53488800 |
| H | -4.56009800 | 1.58100500  | 0.93976700  |
| C | -3.68736500 | -0.96941300 | 0.94650700  |
| H | -3.67448300 | -1.99070300 | 0.56921000  |
| H | -2.78712800 | -0.80947500 | 1.53808300  |
| H | -4.55893900 | -0.85938300 | 1.61036600  |
| C | -4.86932100 | -0.27003000 | -1.01771500 |
| H | -4.84580000 | 0.41178500  | -1.86591000 |
| H | -4.84494200 | -1.29004000 | -1.39698700 |
| H | -5.82220300 | -0.12376300 | -0.48510500 |

-----

**S3-MP2/cc-pVDZ**

|   |             |             |             |
|---|-------------|-------------|-------------|
| C | -2.01439200 | 0.32236400  | -0.00008000 |
| C | -0.60455600 | 0.28735600  | -0.00014700 |
| C | 0.12879100  | -0.90039200 | -0.00009900 |
| C | -0.57977700 | -2.11417600 | -0.00000600 |
| C | -1.98467200 | -2.13551200 | 0.00004800  |
| C | -2.67667900 | -0.92301900 | 0.00000600  |
| C | -2.73900000 | 1.55924000  | -0.00016600 |

|   |             |             |             |
|---|-------------|-------------|-------------|
| C | -3.36483100 | 2.62237000  | 0.00032600  |
| F | 0.05142900  | 1.47071100  | -0.00026200 |
| F | -4.02236600 | -0.92815100 | 0.00005000  |
| H | 1.22648100  | -0.85720700 | -0.00014100 |
| H | -0.02673400 | -3.05852000 | 0.00001700  |
| H | -2.55017300 | -3.07088000 | 0.00012700  |
| H | -3.91016500 | 3.54976200  | 0.00041400  |
| N | 3.33071500  | -0.06711300 | 0.00004600  |
| C | 3.27256400  | 0.76991000  | -1.19483600 |
| C | 4.55076000  | -0.86564000 | 0.00011700  |
| C | 3.27243300  | 0.76990900  | 1.19492200  |
| H | 3.29742400  | 0.13365000  | -2.09467900 |
| H | 2.33090600  | 1.34103500  | -1.19429800 |
| H | 4.12296000  | 1.48786500  | -1.25022600 |
| H | 4.57349800  | -1.50974900 | 0.89419000  |
| H | 4.57370600  | -1.50958500 | -0.89406800 |
| H | 5.47088000  | -0.23662600 | 0.00027900  |
| H | 2.33074300  | 1.34098100  | 1.19432700  |
| H | 3.29727700  | 0.13365000  | 2.09476600  |
| H | 4.12278700  | 1.48791000  | 1.25036500  |

### **S3-MP2/cc-pVTZ**

|   |             |             |            |
|---|-------------|-------------|------------|
| C | -2.02851200 | 0.32673300  | 0.00008200 |
| C | -0.62967000 | 0.30619000  | 0.00003800 |
| C | 0.11154300  | -0.86200600 | 0.00002800 |
| C | -0.57499500 | -2.07455600 | 0.00005600 |
| C | -1.96742800 | -2.11281600 | 0.00003800 |
| C | -2.66627700 | -0.91857500 | 0.00005900 |
| C | -2.76100000 | 1.54273100  | 0.00005400 |
| C | -3.38795700 | 2.58495000  | 0.00000300 |
| F | 0.01142300  | 1.48694000  | 0.00000500 |
| F | -4.00454700 | -0.94224300 | 0.00001200 |

|   |             |             |             |
|---|-------------|-------------|-------------|
| H | 1.19591200  | -0.80922000 | -0.00000600 |
| H | -0.01709400 | -3.00011400 | 0.00003100  |
| H | -2.51448800 | -3.04367300 | 0.00000600  |
| H | -3.93636800 | 3.49374800  | -0.00001400 |
| N | 3.33611400  | -0.07596800 | 0.00001600  |
| C | 3.28482600  | 0.75685400  | -1.19031600 |
| C | 4.54817200  | -0.87593100 | 0.00001500  |
| C | 3.28474500  | 0.75672900  | 1.19043200  |
| H | 3.30302100  | 0.12764400  | -2.07887300 |
| H | 2.36282100  | 1.33539700  | -1.19203000 |
| H | 4.13457000  | 1.45486700  | -1.24218600 |
| H | 4.56952500  | -1.51122300 | 0.88384200  |
| H | 4.56958200  | -1.51113600 | -0.88387300 |
| H | 5.45599000  | -0.25261000 | 0.00007500  |
| H | 2.36274400  | 1.33527800  | 1.19213800  |
| H | 3.30286800  | 0.12742400  | 2.07892300  |
| H | 4.13448900  | 1.45473000  | 1.24243900  |

**S3- $\omega$ B97X-D/cc-pVTZ**

|   |             |             |             |
|---|-------------|-------------|-------------|
| C | -2.04118200 | 0.32674700  | 0.00002600  |
| C | -0.64682000 | 0.32218900  | -0.00001700 |
| C | 0.10454300  | -0.83256000 | -0.00002200 |
| C | -0.56381500 | -2.04698100 | 0.00001300  |
| C | -1.94860100 | -2.10414100 | 0.00005200  |
| C | -2.65937300 | -0.92308300 | 0.00006500  |
| C | -2.79083300 | 1.53575900  | 0.00002700  |
| C | -3.42156100 | 2.55270400  | 0.00002800  |
| F | -0.01955600 | 1.50178100  | -0.00005300 |
| F | -3.99014200 | -0.96828500 | 0.00008400  |
| H | 1.18796800  | -0.76860400 | -0.00005400 |
| H | 0.00638500  | -2.96522800 | 0.00000500  |
| H | -2.48261300 | -3.04254800 | 0.00007400  |



|   |             |             |             |
|---|-------------|-------------|-------------|
| H | -3.98213600 | 3.45455000  | 0.00004200  |
| N | 3.36392600  | -0.04547500 | 0.00002400  |
| C | 3.30824800  | 0.77077500  | -1.19609900 |
| C | 4.52567100  | -0.90916100 | 0.00003300  |
| C | 3.30814100  | 0.77065400  | 1.19622500  |
| H | 3.30124500  | 0.13230800  | -2.07980300 |
| H | 2.39399300  | 1.36385700  | -1.19513200 |
| H | 4.16617700  | 1.45884100  | -1.27574500 |
| H | 4.51349000  | -1.54782800 | 0.88346800  |
| H | 4.51356600  | -1.54774200 | -0.88346500 |
| H | 5.47227900  | -0.34293200 | 0.00010100  |
| H | 2.39388900  | 1.36374000  | 1.19523300  |
| H | 3.30105400  | 0.13209800  | 2.07986400  |
| H | 4.16606500  | 1.45870900  | 1.27601900  |

**S3-B2PLYP-D/cc-pVTZ**

|   |             |             |             |
|---|-------------|-------------|-------------|
| C | 2.00852100  | 0.32896400  | 0.00008100  |
| C | 0.61011300  | 0.27802400  | -0.00001300 |
| C | -0.10951300 | -0.90120900 | -0.00026700 |
| C | 0.59822100  | -2.09984900 | -0.00044000 |
| C | 1.98977600  | -2.11302500 | -0.00035700 |
| C | 2.66498400  | -0.90701800 | -0.00010200 |
| C | 2.71871200  | 1.55814000  | 0.00034700  |
| C | 3.32138700  | 2.60307300  | 0.00057400  |
| F | -0.05838700 | 1.44558200  | 0.00015700  |
| F | 4.00468100  | -0.91162400 | -0.00002200 |
| H | -1.19269600 | -0.86578300 | -0.00033800 |
| H | 0.05761200  | -3.03474200 | -0.00064100 |
| H | 2.55392100  | -3.03269200 | -0.00048800 |
| H | 3.85240000  | 3.52103000  | 0.00077600  |
| N | -3.33532900 | -0.07084600 | -0.00011300 |
| C | -3.24223600 | 0.75246700  | 1.19529600  |

|   |             |             |             |
|---|-------------|-------------|-------------|
| C | -4.56583800 | -0.84305800 | -0.00026900 |
| C | -3.24248600 | 0.75337200  | -1.19491400 |
| H | -3.28183000 | 0.11890800  | 2.08079300  |
| H | -2.29733900 | 1.29290900  | 1.19322700  |
| H | -4.06307300 | 1.48499400  | 1.25690600  |
| H | -4.60245800 | -1.47716900 | -0.88531900 |
| H | -4.60227100 | -1.47783300 | 0.88431200  |
| H | -5.46026200 | -0.19885000 | 0.00006600  |
| H | -2.29757400 | 1.29378800  | -1.19265800 |
| H | -3.28230700 | 0.12048700  | -2.08088500 |
| H | -4.06331700 | 1.48596800  | -1.25578600 |

**S3-B2PLYP-D3/cc-pVTZ**

|   |             |             |             |
|---|-------------|-------------|-------------|
| C | 2.03345300  | 0.31909500  | 0.00008700  |
| C | 0.63519600  | 0.28715200  | 0.00004100  |
| C | -0.09873200 | -0.88265600 | -0.00025300 |
| C | 0.59319500  | -2.08968500 | -0.00051800 |
| C | 1.98389600  | -2.12101300 | -0.00049500 |
| C | 2.67412700  | -0.92428300 | -0.00019200 |
| C | 2.75919300  | 1.53841900  | 0.00038300  |
| C | 3.37533100  | 2.57520300  | 0.00064600  |
| F | -0.01599400 | 1.46365600  | 0.00029600  |
| F | 4.01359000  | -0.94400700 | -0.00018100 |
| H | -1.18121800 | -0.83349100 | -0.00027000 |
| H | 0.04064600  | -3.01738100 | -0.00075400 |
| H | 2.53538800  | -3.04808600 | -0.00070800 |
| H | 3.91799900  | 3.48585400  | 0.00086800  |
| N | -3.34392500 | -0.03894900 | -0.00002300 |
| C | -3.29080500 | 0.78463100  | 1.19740200  |
| C | -4.52492000 | -0.88482800 | -0.00022800 |
| C | -3.29088500 | 0.78532200  | -1.19697600 |
| H | -3.29141600 | 0.14850500  | 2.08111400  |

|   |             |             |             |
|---|-------------|-------------|-------------|
| H | -2.37578900 | 1.37338600  | 1.19624400  |
| H | -4.14655700 | 1.47388600  | 1.26901600  |
| H | -4.52236600 | -1.52130600 | -0.88354300 |
| H | -4.52230700 | -1.52181600 | 0.88272000  |
| H | -5.45962600 | -0.30200300 | -0.00002800 |
| H | -2.37586600 | 1.37407200  | -1.19554100 |
| H | -3.29156100 | 0.14970600  | -2.08105400 |
| H | -4.14663900 | 1.47462300  | -1.26813100 |

---

**S4-MP2/cc-pVDZ**

|   |             |             |             |
|---|-------------|-------------|-------------|
| C | -0.86372500 | 0.59724800  | 0.48715500  |
| C | -0.49977500 | -0.58458300 | 1.16323300  |
| C | -1.09459400 | -1.81574600 | 0.88259000  |
| C | -2.08991000 | -1.88265500 | -0.10815100 |
| C | -2.48015700 | -0.72984400 | -0.80808300 |
| C | -1.86216500 | 0.48486700  | -0.49956100 |
| C | -0.23265900 | 1.85042500  | 0.77318900  |
| C | 0.28864300  | 2.94134600  | 1.02086200  |
| F | 0.44470400  | -0.51295300 | 2.11462500  |
| F | -2.21539900 | 1.59457500  | -1.17638700 |
| H | -0.77779000 | -2.69932700 | 1.44289500  |
| H | -2.56613000 | -2.84154100 | -0.33434200 |
| H | -3.24937800 | -0.75555000 | -1.58414600 |
| H | 0.74722200  | 3.88950500  | 1.24088900  |
| N | 1.92152000  | -0.27687600 | -0.51901200 |
| C | 2.43827300  | -1.60272100 | -0.21438200 |
| C | 2.98319400  | 0.71517100  | -0.42804800 |
| C | 1.31535600  | -0.25877100 | -1.84207700 |
| H | 2.85212600  | -1.61189100 | 0.80710000  |
| H | 1.61714500  | -2.33770300 | -0.26203500 |
| H | 3.23727000  | -1.92820900 | -0.92178500 |
| H | 2.57035900  | 1.71459200  | -0.63835500 |

|   |            |             |             |
|---|------------|-------------|-------------|
| H | 3.39438300 | 0.72122800  | 0.59475600  |
| H | 3.81791900 | 0.51826700  | -1.14178400 |
| H | 0.49458600 | -0.99484900 | -1.87996400 |
| H | 0.89142500 | 0.74005900  | -2.04046900 |
| H | 2.04159300 | -0.49947600 | -2.65418500 |

#### S4-MP2/cc-pVTZ

|   |             |             |             |
|---|-------------|-------------|-------------|
| C | -0.87899800 | 0.61228500  | 0.49519100  |
| C | -0.52250700 | -0.54169900 | 1.19987700  |
| C | -1.08191500 | -1.77820300 | 0.93086000  |
| C | -2.03903700 | -1.88053000 | -0.07704900 |
| C | -2.42631600 | -0.75854300 | -0.80438700 |
| C | -1.84107400 | 0.46052100  | -0.50641100 |
| C | -0.27125500 | 1.86573300  | 0.76111000  |
| C | 0.24290100  | 2.94549600  | 0.98646400  |
| F | 0.39028200  | -0.43677700 | 2.16844100  |
| F | -2.19189700 | 1.54276800  | -1.21375400 |
| H | -0.76915600 | -2.63491200 | 1.50911000  |
| H | -2.48648300 | -2.83976600 | -0.29455200 |
| H | -3.16438100 | -0.81282200 | -1.59052700 |
| H | 0.68839800  | 3.88753500  | 1.18913500  |
| N | 1.91975000  | -0.29325900 | -0.52686700 |
| C | 2.40691100  | -1.63514300 | -0.27912900 |
| C | 2.99384200  | 0.67130000  | -0.39530200 |
| C | 1.31338600  | -0.20677500 | -1.84029600 |
| H | 2.82206800  | -1.69361300 | 0.72605700  |
| H | 1.58106000  | -2.34251500 | -0.35290900 |
| H | 3.18670000  | -1.93920100 | -0.99632200 |
| H | 2.60172900  | 1.67421900  | -0.55483300 |
| H | 3.40752500  | 0.62142700  | 0.61076800  |
| H | 3.80794700  | 0.49301100  | -1.11675800 |
| H | 0.49035800  | -0.91828900 | -1.90950800 |

|   |            |             |             |
|---|------------|-------------|-------------|
| H | 0.91460300 | 0.79586000  | -1.99424800 |
| H | 2.02959700 | -0.42352000 | -2.64963400 |

**S4- $\omega$ B97X-D/cc-pVTZ**

|   |             |             |             |
|---|-------------|-------------|-------------|
| C | -0.92502500 | 0.67371000  | 0.49769100  |
| C | -0.52296400 | -0.44282200 | 1.22832700  |
| C | -1.03202700 | -1.70269400 | 0.99839600  |
| C | -1.97828900 | -1.86773200 | -0.00061200 |
| C | -2.41015600 | -0.79026600 | -0.75638800 |
| C | -1.87686200 | 0.45457800  | -0.49435900 |
| C | -0.35986300 | 1.95857500  | 0.72250300  |
| C | 0.12040500  | 3.03984300  | 0.90371000  |
| F | 0.38457400  | -0.27931500 | 2.18365300  |
| F | -2.27378000 | 1.49335800  | -1.22746700 |
| H | -0.68075300 | -2.53128800 | 1.59454500  |
| H | -2.38556700 | -2.85034900 | -0.19202800 |
| H | -3.14510700 | -0.89832700 | -1.53963200 |
| H | 0.54133500  | 4.00038900  | 1.07015200  |
| N | 1.95328400  | -0.38148900 | -0.57740300 |
| C | 2.39954700  | -1.74600700 | -0.42359900 |
| C | 2.99951000  | 0.56947800  | -0.27829300 |
| C | 1.36456600  | -0.14904200 | -1.87605500 |
| H | 2.76952100  | -1.90138400 | 0.59039100  |
| H | 1.56369000  | -2.42763100 | -0.58858700 |
| H | 3.20542900  | -2.01553300 | -1.12844500 |
| H | 2.59991900  | 1.58189700  | -0.33561800 |
| H | 3.36461900  | 0.40834500  | 0.73618000  |
| H | 3.85616400  | 0.49223700  | -0.97057900 |
| H | 0.53085000  | -0.83583200 | -2.03037000 |
| H | 0.97792800  | 0.86951300  | -1.92911400 |
| H | 2.08308400  | -0.28762500 | -2.702468   |

**S4-B2PLYP-D/cc-pVTZ**

|   |             |             |             |
|---|-------------|-------------|-------------|
| C | -0.89397000 | 0.63495100  | 0.48594000  |
| C | -0.50879600 | -0.50776100 | 1.19451200  |
| C | -1.05252300 | -1.75472600 | 0.95259500  |
| C | -2.02345400 | -1.88319300 | -0.03651900 |
| C | -2.43981800 | -0.77866400 | -0.77141800 |
| C | -1.86891500 | 0.45111100  | -0.49735400 |
| C | -0.30015100 | 1.90057100  | 0.72467700  |
| C | 0.20392200  | 2.97881500  | 0.92218600  |
| F | 0.42196500  | -0.38255700 | 2.14469600  |
| F | -2.25195800 | 1.51660300  | -1.21519900 |
| H | -0.71304500 | -2.59867100 | 1.53254300  |
| H | -2.45841200 | -2.85138200 | -0.23513200 |
| H | -3.18825300 | -0.85357300 | -1.54468700 |
| H | 0.64281400  | 3.92736500  | 1.10185600  |
| N | 1.93272900  | -0.32285000 | -0.54530900 |
| C | 2.38898000  | -1.68161400 | -0.33359500 |
| C | 3.00167700  | 0.63225300  | -0.32745900 |
| C | 1.34328700  | -0.16414500 | -1.86004300 |
| H | 2.77521500  | -1.78315700 | 0.68022600  |
| H | 1.55298500  | -2.37044500 | -0.45563000 |
| H | 3.18429400  | -1.97505400 | -1.03952800 |
| H | 2.61293000  | 1.64289800  | -0.44124200 |
| H | 3.38601900  | 0.52421800  | 0.68616900  |
| H | 3.83794200  | 0.49445700  | -1.03386700 |
| H | 0.51357300  | -0.86163900 | -1.97448700 |
| H | 0.95780000  | 0.84946800  | -1.96780400 |
| H | 2.06719900  | -0.34869200 | -2.67159900 |

**S4-B2PLYP-D3/cc-pVTZ**

|   |             |             |            |
|---|-------------|-------------|------------|
| C | -0.92940200 | 0.67702000  | 0.48360700 |
| C | -0.50507500 | -0.42437500 | 1.23247900 |

|   |             |             |             |
|---|-------------|-------------|-------------|
| C | -1.01677000 | -1.69387700 | 1.04865300  |
| C | -1.98935000 | -1.88909800 | 0.07374800  |
| C | -2.44198000 | -0.82817600 | -0.70247100 |
| C | -1.90613200 | 0.42704700  | -0.48280400 |
| C | -0.37400100 | 1.96815300  | 0.67038800  |
| C | 0.09978600  | 3.06680000  | 0.82478700  |
| F | 0.43151600  | -0.23166800 | 2.16606500  |
| F | -2.32765900 | 1.45361800  | -1.23444200 |
| H | -0.64870800 | -2.50431600 | 1.65776100  |
| H | -2.39818300 | -2.87616300 | -0.08192000 |
| H | -3.19408100 | -0.95664900 | -1.46478200 |
| H | 0.51066300  | 4.03377800  | 0.96609500  |
| N | 1.93591100  | -0.38301400 | -0.59712600 |
| C | 2.35207000  | -1.76715200 | -0.49480300 |
| C | 2.99741700  | 0.52216300  | -0.20029100 |
| C | 1.44026700  | -0.07328300 | -1.92398500 |
| H | 2.66166200  | -1.98196200 | 0.52712100  |
| H | 1.51688300  | -2.42065300 | -0.74371400 |
| H | 3.19155900  | -2.01123400 | -1.16652700 |
| H | 2.63388800  | 1.54703100  | -0.23759600 |
| H | 3.29834700  | 0.30584900  | 0.82338800  |
| H | 3.88640400  | 0.44245800  | -0.84759700 |
| H | 0.61033100  | -0.73498100 | -2.16858800 |
| H | 1.07706100  | 0.95300700  | -1.94941100 |
| H | 2.21161300  | -0.18573600 | -2.70350300 |

-----  
**S5-MP2/cc-pVDZ**

|   |             |            |             |
|---|-------------|------------|-------------|
| C | -1.25926000 | 0.10100600 | 0.00170500  |
| C | -0.84588400 | 0.71560500 | -1.19589100 |
| C | -0.06983300 | 1.87466500 | -1.21439300 |
| C | 0.31778000  | 2.44895800 | 0.00668400  |
| C | -0.06529800 | 1.86645200 | 1.22529300  |

|   |             |             |             |
|---|-------------|-------------|-------------|
| C | -0.84138700 | 0.70752400  | 1.20185300  |
| C | -2.03120800 | -1.10560000 | -0.00089300 |
| C | -2.68149200 | -2.15491700 | -0.00316300 |
| F | -1.20340800 | 0.14147500  | -2.36091800 |
| F | -1.19443900 | 0.12544500  | 2.36429800  |
| H | 0.21763700  | 2.30909900  | -2.17545100 |
| H | 0.92384900  | 3.36021500  | 0.00862400  |
| H | 0.22579200  | 2.29438300  | 2.18817700  |
| H | -3.25992400 | -3.06227400 | -0.00511500 |
| N | 1.72749300  | -0.72075300 | -0.00399300 |
| C | 3.02368500  | -0.06101700 | -0.00452100 |
| C | 1.57009700  | -1.53673600 | -1.19997000 |
| C | 1.57410800  | -1.54242700 | 1.18859800  |
| H | 3.11040300  | 0.58166100  | -0.89653800 |
| H | 3.11318500  | 0.57759800  | 0.89014400  |
| H | 3.87777700  | -0.77953600 | -0.00748600 |
| H | 0.57035300  | -2.00181000 | -1.20149700 |
| H | 1.65348000  | -0.90046900 | -2.09690500 |
| H | 2.33431100  | -2.34649400 | -1.27353500 |
| H | 1.66053700  | -0.91045200 | 2.08827400  |
| H | 0.57437300  | -2.00748800 | 1.19132600  |
| H | 2.33855700  | -2.35252200 | 1.25570600  |

### **S5-MP2/cc-pVTZ**

|   |             |             |             |
|---|-------------|-------------|-------------|
| C | -1.27340600 | 0.11151500  | 0.00225800  |
| C | -0.86523000 | 0.72633200  | -1.18425600 |
| C | -0.09772200 | 1.87632300  | -1.20422900 |
| C | 0.28631000  | 2.44559300  | 0.00661300  |
| C | -0.09418000 | 1.86944300  | 1.21531600  |
| C | -0.86174300 | 0.71957200  | 1.19104900  |
| C | -2.02617500 | -1.09095100 | -0.00006000 |
| C | -2.66077600 | -2.12952600 | -0.00209000 |



|   |             |             |             |
|---|-------------|-------------|-------------|
| F | -1.22178900 | 0.15801500  | -2.34399900 |
| F | -1.21488500 | 0.14464600  | 2.34857900  |
| H | 0.18650700  | 2.30589700  | -2.15330700 |
| H | 0.88527500  | 3.34519700  | 0.00829500  |
| H | 0.19283500  | 2.29361000  | 2.16598700  |
| H | -3.22170500 | -3.03086800 | -0.00383100 |
| N | 1.75354200  | -0.72863100 | -0.00432300 |
| C | 3.05253400  | -0.08827400 | -0.00434300 |
| C | 1.58212400  | -1.53582600 | -1.19668200 |
| C | 1.58550000  | -1.54260800 | 1.18389900  |
| H | 3.14808700  | 0.54449800  | -0.88608700 |
| H | 3.15059000  | 0.53947700  | 0.88070900  |
| H | 3.88233500  | -0.81425900 | -0.00758100 |
| H | 0.58917200  | -1.98467400 | -1.19618400 |
| H | 1.67271600  | -0.90720200 | -2.08206600 |
| H | 2.32832200  | -2.34402900 | -1.26758200 |
| H | 1.67866800  | -0.91904900 | 2.07259200  |
| H | 0.59252400  | -1.99140300 | 1.18369100  |
| H | 2.33185400  | -2.35122900 | 1.24804900  |

**S5- $\omega$ B97X-D/cc-pVTZ**

|   |             |             |             |
|---|-------------|-------------|-------------|
| C | -1.29810600 | 0.14530000  | 0.00232100  |
| C | -0.89571900 | 0.76309800  | -1.17897200 |
| C | -0.14087500 | 1.91523100  | -1.19873600 |
| C | 0.23582200  | 2.48233300  | 0.00721200  |
| C | -0.13766900 | 1.90809100  | 1.21077100  |
| C | -0.89256100 | 0.75607600  | 1.18618400  |
| C | -2.03434100 | -1.07088700 | -0.00030500 |
| C | -2.63701600 | -2.10524600 | -0.00254700 |
| F | -1.24397100 | 0.19935800  | -2.33454600 |
| F | -1.23768300 | 0.18544700  | 2.33931000  |
| H | 0.14394300  | 2.34607800  | -2.14670900 |

|   |             |             |             |
|---|-------------|-------------|-------------|
| H | 0.83107600  | 3.38435900  | 0.00909000  |
| H | 0.14970100  | 2.33329200  | 2.16052200  |
| H | -3.17999300 | -3.01781800 | -0.00451300 |
| N | 1.80876900  | -0.79549600 | -0.00469400 |
| C | 3.08483100  | -0.12063500 | -0.00509100 |
| C | 1.60994300  | -1.57938000 | -1.20274400 |
| C | 1.61381200  | -1.58540300 | 1.19002700  |
| H | 3.16506500  | 0.51677900  | -0.88652400 |
| H | 3.16793800  | 0.51241200  | 0.87921800  |
| H | 3.94017900  | -0.81916600 | -0.00821800 |
| H | 0.61148700  | -2.01834900 | -1.19583900 |
| H | 1.69057200  | -0.93924200 | -2.08212500 |
| H | 2.34462400  | -2.39705400 | -1.30446800 |
| H | 1.69798400  | -0.94983400 | 2.07238100  |
| H | 0.61507800  | -2.02377000 | 1.18446200  |
| H | 2.34839400  | -2.40398500 | 1.28494600  |

**S5-B2PLYP-D/cc-pVTZ**

|   |             |             |             |
|---|-------------|-------------|-------------|
| C | -1.27281300 | -0.05247700 | 0.00052800  |
| C | -0.95628300 | 0.61737400  | -1.18421400 |
| C | -0.37255800 | 1.86858200  | -1.20704600 |
| C | -0.08175500 | 2.49015500  | 0.00213600  |
| C | -0.37100500 | 1.86633000  | 1.21052400  |
| C | -0.95471600 | 0.61514600  | 1.18611000  |
| C | -1.83648600 | -1.35415300 | -0.00033400 |
| C | -2.30261800 | -2.46733600 | -0.00108100 |
| F | -1.21503800 | 0.00106300  | -2.34636300 |
| F | -1.21189800 | -0.00335800 | 2.34743400  |
| H | -0.15137500 | 2.33138300  | -2.15609900 |
| H | 0.37644700  | 3.46796000  | 0.00275100  |
| H | -0.14857500 | 2.32735200  | 2.16015100  |
| H | -2.72029300 | -3.44219900 | -0.00170300 |

|   |            |             |             |
|---|------------|-------------|-------------|
| N | 1.86859200 | -0.52095700 | -0.00098800 |
| C | 3.10034200 | 0.24206800  | 0.00224200  |
| C | 1.75820400 | -1.33237500 | -1.19881600 |
| C | 1.75675000 | -1.34008700 | 1.19146800  |
| H | 3.13802400 | 0.88090400  | -0.87994600 |
| H | 3.13694100 | 0.87512800  | 0.88862600  |
| H | 3.99651100 | -0.40186900 | 0.00070300  |
| H | 0.80662800 | -1.86257400 | -1.19667400 |
| H | 1.79257300 | -0.69266100 | -2.08045000 |
| H | 2.56967400 | -2.07544800 | -1.27810500 |
| H | 1.78992000 | -0.70607300 | 2.07724700  |
| H | 0.80523500 | -1.87034600 | 1.18467200  |
| H | 2.56820500 | -2.08356700 | 1.26699600  |

**S5-B2PLYP-D3/cc-pVTZ**

|   |             |             |             |
|---|-------------|-------------|-------------|
| C | -1.30026500 | 0.14969700  | 0.00352700  |
| C | -0.90031200 | 0.77038200  | -1.18210500 |
| C | -0.14943700 | 1.92859300  | -1.20668100 |
| C | 0.22895600  | 2.50275100  | 0.00121200  |
| C | -0.13957400 | 1.92459300  | 1.21021200  |
| C | -0.89030000 | 0.76626200  | 1.18788500  |
| C | -2.03857800 | -1.06097600 | 0.00444800  |
| C | -2.65563700 | -2.09779700 | 0.00507600  |
| F | -1.25037300 | 0.19782800  | -2.34244600 |
| F | -1.23038800 | 0.18957300  | 2.34914200  |
| H | 0.12948300  | 2.35822700  | -2.15589800 |
| H | 0.81772700  | 3.40774900  | 0.00029600  |
| H | 0.14722300  | 2.35095800  | 2.15855300  |
| H | -3.20487300 | -3.00457600 | 0.00568000  |
| N | 1.79946200  | -0.79976600 | -0.00311900 |
| C | 3.07907100  | -0.12026100 | 0.00369400  |
| C | 1.62524100  | -1.59089900 | -1.20666700 |

|   |            |             |             |
|---|------------|-------------|-------------|
| C | 1.62243200 | -1.60934700 | 1.18772100  |
| H | 3.15930800 | 0.52003300  | -0.87369700 |
| H | 3.15719700 | 0.50626800  | 0.89116300  |
| H | 3.93339600 | -0.81758700 | -0.00067100 |
| H | 0.63541300 | -2.04432800 | -1.20839700 |
| H | 1.70712800 | -0.95016200 | -2.08354900 |
| H | 2.37354000 | -2.39536900 | -1.29762600 |
| H | 1.70040100 | -0.98196500 | 2.07456000  |
| H | 0.63334700 | -2.06431500 | 1.17925500  |
| H | 2.37169500 | -2.41397500 | 1.26884400  |

-----  
**S6-MP2/cc-pVDZ**

|   |             |             |             |
|---|-------------|-------------|-------------|
| C | -1.04360100 | 0.72242500  | 0.00217100  |
| C | -1.29870100 | 0.02749300  | 1.20220500  |
| C | -1.78771500 | -1.28007800 | 1.22098800  |
| C | -2.03718100 | -1.92734200 | -0.00059200 |
| C | -1.79346500 | -1.27535500 | -1.22080600 |
| C | -1.30398200 | 0.03203000  | -1.19933700 |
| C | -0.55615400 | 2.06944300  | 0.00379500  |
| C | -0.11907700 | 3.22344900  | 0.00525500  |
| F | -1.04064100 | 0.65501900  | 2.36356400  |
| F | -1.05083800 | 0.66375800  | -2.35947600 |
| H | -1.96306900 | -1.77021400 | 2.18201600  |
| H | -2.42082100 | -2.95201100 | -0.00167100 |
| H | -1.97355200 | -1.76176200 | -2.18285400 |
| H | 0.24777700  | 4.23509400  | 0.00652600  |
| N | 2.87404400  | -0.68943700 | -0.00454000 |
| C | 2.63828800  | 0.10040400  | 1.19853700  |
| C | 1.99448600  | -1.85157600 | -0.01491700 |
| C | 2.63893200  | 0.12096800  | -1.19401200 |
| H | 2.85784500  | -0.51062400 | 2.09011100  |
| H | 3.31101400  | 0.97397400  | 1.20616400  |

|   |            |             |             |
|---|------------|-------------|-------------|
| H | 1.59157900 | 0.47125800  | 1.28138000  |
| H | 2.19351100 | -2.45977200 | -0.91330700 |
| H | 2.19241500 | -2.47503700 | 0.87318700  |
| H | 0.91454300 | -1.57809400 | -0.01333200 |
| H | 3.31064200 | 0.99531200  | -1.18557100 |
| H | 2.86026700 | -0.47420000 | -2.09581800 |
| H | 1.59186500 | 0.49197300  | -1.27156200 |

### S6-MP2/cc-pVTZ

|   |             |             |             |
|---|-------------|-------------|-------------|
| C | -1.04732400 | 0.72616100  | 0.00435300  |
| C | -1.29497200 | 0.02793200  | 1.19129900  |
| C | -1.76366200 | -1.27392900 | 1.20768600  |
| C | -1.99900000 | -1.91673100 | -0.00507400 |
| C | -1.76591700 | -1.26447300 | -1.21321800 |
| C | -1.29721100 | 0.03723000  | -1.18753800 |
| C | -0.56329600 | 2.05961700  | 0.00915100  |
| C | -0.13799900 | 3.19946100  | 0.01332600  |
| F | -1.05789300 | 0.65295400  | 2.34966300  |
| F | -1.06233200 | 0.67128700  | -2.34143400 |
| H | -1.93463300 | -1.76176400 | 2.15556900  |
| H | -2.36412200 | -2.93361200 | -0.00870000 |
| H | -1.93863700 | -1.74489100 | -2.16456500 |
| H | 0.22534900  | 4.19706100  | 0.01698300  |
| N | 2.85894300  | -0.69682500 | -0.00500500 |
| C | 2.63651900  | 0.10003900  | 1.18850000  |
| C | 1.97045700  | -1.84460900 | -0.00800400 |
| C | 2.63348400  | 0.10855200  | -1.19221000 |
| H | 2.83288800  | -0.50342100 | 2.07368600  |
| H | 3.31804000  | 0.94944200  | 1.19441100  |
| H | 1.60843800  | 0.48697700  | 1.25507400  |
| H | 2.15671100  | -2.45079200 | -0.89374600 |
| H | 2.15930400  | -2.45743500 | 0.87260400  |

|   |            |             |             |
|---|------------|-------------|-------------|
| H | 0.90750800 | -1.55645900 | -0.00535300 |
| H | 3.31434800 | 0.95849700  | -1.19332500 |
| H | 2.82846600 | -0.48828600 | -2.08218300 |
| H | 1.60495400 | 0.49511700  | -1.25384600 |

**S6- $\omega$ B97X-D/cc-pVTZ**

|   |             |             |             |
|---|-------------|-------------|-------------|
| C | -1.07371500 | 0.71503700  | 0.00439400  |
| C | -1.32871600 | 0.02079400  | 1.18630600  |
| C | -1.81038000 | -1.27068300 | 1.20313700  |
| C | -2.05088300 | -1.90608700 | -0.00430000 |
| C | -1.81248200 | -1.26190900 | -1.20749600 |
| C | -1.33072400 | 0.02939300  | -1.18209200 |
| C | -0.56522100 | 2.04272600  | 0.00871100  |
| C | -0.12123800 | 3.15384500  | 0.01213200  |
| F | -1.08581300 | 0.63533400  | 2.34075900  |
| F | -1.08966700 | 0.65224100  | -2.33247300 |
| H | -1.98500500 | -1.75831000 | 2.15020000  |
| H | -2.42557000 | -2.91956700 | -0.00765500 |
| H | -1.98868000 | -1.74265800 | -2.15777600 |
| H | 0.26733100  | 4.14215800  | 0.01517900  |
| N | 2.85146100  | -0.66881000 | -0.00498900 |
| C | 2.65893300  | 0.11698300  | 1.19506900  |
| C | 2.00771100  | -1.84326600 | -0.00933400 |
| C | 2.65669800  | 0.12746700  | -1.19776800 |
| H | 2.86939200  | -0.49275200 | 2.07441100  |
| H | 3.34594400  | 0.96370000  | 1.19703300  |
| H | 1.63507100  | 0.51375300  | 1.29006400  |
| H | 2.21470500  | -2.44545100 | -0.89477200 |
| H | 2.21541500  | -2.45248900 | 0.87110300  |
| H | 0.93190800  | -1.59905000 | -0.00797200 |
| H | 3.34474300  | 0.97334700  | -1.19432200 |
| H | 2.86409600  | -0.47497400 | -2.08284300 |

|   |            |            |             |
|---|------------|------------|-------------|
| H | 1.63309800 | 0.52632600 | -1.28660200 |
|---|------------|------------|-------------|

**S6-B2PLYP-D/cc-pVTZ**

|   |             |             |             |
|---|-------------|-------------|-------------|
| C | -1.03739000 | 0.72690700  | 0.00307200  |
| C | -1.28765300 | 0.02783400  | 1.18888800  |
| C | -1.76724400 | -1.26806400 | 1.20964900  |
| C | -2.01155400 | -1.90882500 | -0.00058100 |
| C | -1.77555000 | -1.26164100 | -1.20904500 |
| C | -1.29575200 | 0.03412600  | -1.18473600 |
| C | -0.54223200 | 2.05617600  | 0.00500600  |
| C | -0.11199400 | 3.18303000  | 0.00742200  |
| F | -1.03807000 | 0.64661800  | 2.34936400  |
| F | -1.05415200 | 0.65906000  | -2.34356700 |
| H | -1.93647800 | -1.75318500 | 2.15814100  |
| H | -2.38401700 | -2.92215600 | -0.00199700 |
| H | -1.95143700 | -1.74170300 | -2.15890600 |
| H | 0.26085700  | 4.17597700  | 0.00941000  |
| N | 2.83313300  | -0.68282300 | -0.00612000 |
| C | 2.62515700  | 0.10999300  | 1.19370800  |
| C | 1.96757500  | -1.84879100 | -0.00885500 |
| C | 2.62173300  | 0.11799700  | -1.20001100 |
| H | 2.83300000  | -0.49799800 | 2.07405000  |
| H | 3.30703600  | 0.95991800  | 1.19330600  |
| H | 1.59856000  | 0.49789200  | 1.27708000  |
| H | 2.16692000  | -2.45121700 | -0.89510500 |
| H | 2.16906600  | -2.45698800 | 0.87296200  |
| H | 0.89850700  | -1.58457900 | -0.00670000 |
| H | 3.30333700  | 0.96813300  | -1.19572000 |
| H | 2.82737000  | -0.48398100 | -2.08498700 |
| H | 1.59477000  | 0.50610900  | -1.27795800 |

**S6-B2PLYP-D3/cc-pVTZ**

|   |             |             |             |
|---|-------------|-------------|-------------|
| C | -1.09468800 | 0.73679600  | 0.00500500  |
| C | -1.34712300 | 0.03753400  | 1.18954300  |
| C | -1.82111400 | -1.25996700 | 1.20801700  |
| C | -2.05793000 | -1.90103900 | -0.00293400 |
| C | -1.82119300 | -1.25266800 | -1.21001000 |
| C | -1.34708900 | 0.04464900  | -1.18370600 |
| C | -0.60311100 | 2.06692000  | 0.00902100  |
| C | -0.17436600 | 3.19410700  | 0.01256200  |
| F | -1.10671100 | 0.65934600  | 2.35020200  |
| F | -1.10641000 | 0.67334700  | -2.34060400 |
| H | -1.99301500 | -1.74629600 | 2.15518800  |
| H | -2.42628200 | -2.91568400 | -0.00598300 |
| H | -1.99305600 | -1.73329800 | -2.16009100 |
| H | 0.19662500  | 4.18729200  | 0.01562600  |
| N | 2.88533300  | -0.68879300 | -0.00581900 |
| C | 2.67746000  | 0.09878200  | 1.19664200  |
| C | 2.03736200  | -1.86664800 | -0.01124800 |
| C | 2.67655800  | 0.11055600  | -1.20034000 |
| H | 2.89387300  | -0.50844300 | 2.07454700  |
| H | 3.35358700  | 0.95236500  | 1.19764300  |
| H | 1.64984400  | 0.48104600  | 1.28930100  |
| H | 2.24592200  | -2.46595300 | -0.89657200 |
| H | 2.24625800  | -2.47432300 | 0.86826900  |
| H | 0.96372400  | -1.62238800 | -0.00991400 |
| H | 3.35352700  | 0.96345800  | -1.19402200 |
| H | 2.89119700  | -0.48836000 | -2.08436100 |
| H | 1.64923000  | 0.49476100  | -1.28785600 |

-----  
**S7-MP2/cc-pVDZ**

|   |             |             |             |
|---|-------------|-------------|-------------|
| C | -1.24585200 | 0.62522300  | -0.09822700 |
| C | -1.27694700 | 0.16378600  | 1.23379400  |
| C | -1.60547100 | -1.15227900 | 1.56535200  |



|   |             |             |             |
|---|-------------|-------------|-------------|
| C | -1.92335800 | -2.05040900 | 0.53296900  |
| C | -1.90359600 | -1.63566800 | -0.80896700 |
| C | -1.56794200 | -0.31217800 | -1.10126900 |
| C | -0.90952500 | 1.98069300  | -0.41715500 |
| C | -0.61511700 | 3.14689800  | -0.69202200 |
| F | -0.95432400 | 1.02973700  | 2.21279400  |
| F | -1.53479400 | 0.09310600  | -2.38270600 |
| H | -1.60796100 | -1.45303700 | 2.61609300  |
| H | -2.18335800 | -3.08491100 | 0.77636900  |
| H | -2.14216300 | -2.31815500 | -1.62865400 |
| H | -0.36503000 | 4.16574500  | -0.93154000 |
| N | 2.88001800  | -0.57778600 | 0.31604800  |
| C | 4.07972900  | -0.45452500 | -0.50032300 |
| C | 2.42911700  | 0.74474600  | 0.73219700  |
| C | 1.83035400  | -1.24171100 | -0.44513500 |
| H | 4.87936800  | 0.03187000  | 0.08235800  |
| H | 4.43128600  | -1.45531100 | -0.80105400 |
| H | 3.91041400  | 0.14635300  | -1.42557300 |
| H | 1.53130700  | 0.65726900  | 1.36461600  |
| H | 3.21981700  | 1.23681800  | 1.32270000  |
| H | 2.17614900  | 1.40382400  | -0.13118300 |
| H | 2.17130100  | -2.24492600 | -0.75162300 |
| H | 0.93159000  | -1.35720100 | 0.18104200  |
| H | 1.54086800  | -0.67687300 | -1.36396900 |

### **S7-MP2/cc-pVTZ**

|   |             |             |             |
|---|-------------|-------------|-------------|
| C | -1.16849300 | 0.64156500  | -0.20753200 |
| C | -1.17400300 | 0.27770700  | 1.14358500  |
| C | -1.50933500 | -0.99448000 | 1.57396100  |
| C | -1.86131100 | -1.95097700 | 0.62479000  |
| C | -1.87280500 | -1.63626700 | -0.73195800 |
| C | -1.52794500 | -0.35390500 | -1.12132600 |

|   |             |             |             |
|---|-------------|-------------|-------------|
| C | -0.80572100 | 1.94716600  | -0.62919000 |
| C | -0.48464100 | 3.06529700  | -0.98617400 |
| F | -0.83117100 | 1.20248100  | 2.04802300  |
| F | -1.52151700 | -0.04417800 | -2.42223500 |
| H | -1.49366700 | -1.21675300 | 2.63042000  |
| H | -2.12665700 | -2.94842400 | 0.94440800  |
| H | -2.13949800 | -2.36310400 | -1.48441300 |
| H | -0.21153600 | 4.04246200  | -1.29903400 |
| N | 2.86773400  | -0.69570000 | 0.27376300  |
| C | 3.94699800  | -0.22159900 | -0.57246400 |
| C | 2.34030500  | 0.40305400  | 1.06446900  |
| C | 1.81558300  | -1.26260700 | -0.55033800 |
| H | 4.74570700  | 0.18888200  | 0.04307100  |
| H | 4.35114700  | -1.04981100 | -1.15252900 |
| H | 3.61428700  | 0.56054400  | -1.27426100 |
| H | 1.56804100  | 0.03689900  | 1.73974000  |
| H | 3.13881000  | 0.83693900  | 1.66451200  |
| H | 1.90369000  | 1.19949300  | 0.43945500  |
| H | 2.20365700  | -2.11452000 | -1.10758600 |
| H | 0.99480900  | -1.60564000 | 0.07832300  |
| H | 1.41341100  | -0.53342400 | -1.27254600 |

**S7- $\omega$ B97X-D/cc-pVTZ**

|   |             |             |             |
|---|-------------|-------------|-------------|
| C | -1.17447200 | 0.61734200  | -0.22713300 |
| C | -1.20268700 | 0.31049200  | 1.13190700  |
| C | -1.57611300 | -0.92803700 | 1.60931500  |
| C | -1.94554200 | -1.90679500 | 0.70103400  |
| C | -1.94013900 | -1.65165800 | -0.66082600 |
| C | -1.55624700 | -0.40201200 | -1.09792700 |
| C | -0.75136600 | 1.88931900  | -0.70054600 |
| C | -0.37855000 | 2.95429200  | -1.09899900 |
| F | -0.84173300 | 1.25364900  | 1.99783500  |

|   |             |             |             |
|---|-------------|-------------|-------------|
| F | -1.53071000 | -0.15445300 | -2.40448900 |
| H | -1.57304800 | -1.10812600 | 2.67369800  |
| H | -2.24021600 | -2.88265200 | 1.05946500  |
| H | -2.22098300 | -2.40235200 | -1.38390100 |
| H | -0.05280100 | 3.90120200  | -1.45264400 |
| N | 2.89224200  | -0.67767400 | 0.19965300  |
| C | 3.96083000  | -0.08228100 | -0.57197300 |
| C | 2.33538400  | 0.26746100  | 1.14366100  |
| C | 1.86817000  | -1.22369300 | -0.66376200 |
| H | 4.74728300  | 0.27403100  | 0.09394500  |
| H | 4.39405800  | -0.82558900 | -1.24205400 |
| H | 3.61754100  | 0.77031300  | -1.18407800 |
| H | 1.58643900  | -0.22643800 | 1.76319000  |
| H | 3.12131500  | 0.64270900  | 1.79964500  |
| H | 1.85690200  | 1.13189300  | 0.65235900  |
| H | 2.29354300  | -1.99893400 | -1.30215200 |
| H | 1.07541500  | -1.67255900 | -0.06354100 |
| H | 1.41136500  | -0.45835100 | -1.31474700 |

**S7-B2PLYP-D/cc-pVTZ**

|   |             |             |             |
|---|-------------|-------------|-------------|
| C | -1.18825500 | 0.65164500  | -0.13622700 |
| C | -1.17864500 | 0.22633900  | 1.19597200  |
| C | -1.53361600 | -1.05370400 | 1.57879500  |
| C | -1.92232200 | -1.96014500 | 0.59785800  |
| C | -1.95002600 | -1.58899400 | -0.74254800 |
| C | -1.58424400 | -0.30018900 | -1.08181600 |
| C | -0.80046100 | 1.96420700  | -0.50924300 |
| C | -0.46308400 | 3.07763300  | -0.82783400 |
| F | -0.79437900 | 1.09995700  | 2.13497300  |
| F | -1.59183300 | 0.05789900  | -2.37136500 |
| H | -1.50108800 | -1.32045400 | 2.62355400  |
| H | -2.20201900 | -2.96410300 | 0.87968000  |

|   |             |             |             |
|---|-------------|-------------|-------------|
| H | -2.24247900 | -2.27672600 | -1.52047800 |
| H | -0.16988600 | 4.05783700  | -1.10749800 |
| N | 2.84620700  | -0.71708200 | 0.19418800  |
| C | 3.94029400  | -0.19368400 | -0.60304900 |
| C | 2.34003500  | 0.30205200  | 1.09786900  |
| C | 1.78462300  | -1.21059500 | -0.66472200 |
| H | 4.74477700  | 0.14298400  | 0.05009800  |
| H | 4.32871300  | -0.97601400 | -1.25462100 |
| H | 3.62914500  | 0.65645400  | -1.23388300 |
| H | 1.55880700  | -0.11909700 | 1.72835700  |
| H | 3.14654800  | 0.65464200  | 1.74017100  |
| H | 1.91902200  | 1.16890100  | 0.56299800  |
| H | 2.16578100  | -2.01305700 | -1.29625700 |
| H | 0.97019900  | -1.60373000 | -0.05756100 |
| H | 1.37564300  | -0.42272000 | -1.31902600 |

**S7-B2PLYP-D3/cc-pVTZ**

|   |             |             |             |
|---|-------------|-------------|-------------|
| C | -1.23213000 | 0.62454400  | -0.18821000 |
| C | -1.24677700 | 0.25683000  | 1.16054800  |
| C | -1.58650300 | -1.01218200 | 1.58903000  |
| C | -1.93285800 | -1.96660600 | 0.63892400  |
| C | -1.93516500 | -1.65350700 | -0.71589600 |
| C | -1.58672300 | -0.37337200 | -1.10131100 |
| C | -0.86355800 | 1.92817600  | -0.60727600 |
| C | -0.54223400 | 3.03438300  | -0.96434100 |
| F | -0.90390400 | 1.17884600  | 2.06874900  |
| F | -1.57288100 | -0.06766300 | -2.40413300 |
| H | -1.57538300 | -1.23434100 | 2.64440400  |
| H | -2.20020500 | -2.96297800 | 0.95669800  |
| H | -2.19608700 | -2.37955800 | -1.46955800 |
| H | -0.26349800 | 4.00804400  | -1.27801600 |
| N | 2.93170500  | -0.65164200 | 0.23580100  |

|   |            |             |             |
|---|------------|-------------|-------------|
| C | 4.02345200 | -0.17942600 | -0.59525000 |
| C | 2.39703700 | 0.42622800  | 1.04969300  |
| C | 1.89020300 | -1.25404400 | -0.57609700 |
| H | 4.81439900 | 0.23005400  | 0.03119800  |
| H | 4.43636800 | -1.00821300 | -1.16847500 |
| H | 3.70789400 | 0.60354400  | -1.30467700 |
| H | 1.62049300 | 0.04187200  | 1.70826100  |
| H | 3.18888300 | 0.84614200  | 1.66815900  |
| H | 1.96258800 | 1.23989400  | 0.44765400  |
| H | 2.29768600 | -2.09755700 | -1.13188400 |
| H | 1.08844300 | -1.62022100 | 0.06289600  |
| H | 1.45463400 | -0.54614900 | -1.29995700 |

-----

**S8-MP2/cc-pVDZ**

|   |             |             |             |
|---|-------------|-------------|-------------|
| C | 1.62806300  | 0.45214100  | -0.01672400 |
| C | 1.91198200  | -0.62226300 | -0.88482800 |
| C | 1.76184400  | -1.95592700 | -0.49745600 |
| C | 1.32088400  | -2.23891100 | 0.80581100  |
| C | 1.03010900  | -1.20003900 | 1.70522400  |
| C | 1.18685300  | 0.12045900  | 1.28059400  |
| C | 1.76868100  | 1.81527000  | -0.43454200 |
| C | 1.88023200  | 2.99026000  | -0.79331200 |
| F | 2.33732500  | -0.34006200 | -2.12842500 |
| F | 0.88559900  | 1.12538700  | 2.12344200  |
| H | 1.99465600  | -2.74786500 | -1.21385700 |
| H | 1.20081500  | -3.27917000 | 1.12280000  |
| H | 0.68111800  | -1.39537500 | 2.72235100  |
| H | 1.98044000  | 4.01434800  | -1.10789500 |
| N | -3.13045900 | 0.25626000  | -0.55531300 |
| C | -4.10626900 | 0.91634400  | 0.30032100  |
| H | -3.67694100 | 1.84827500  | 0.70310700  |
| H | -5.00402300 | 1.17362700  | -0.28557100 |

|   |             |             |             |
|---|-------------|-------------|-------------|
| H | -4.42376800 | 0.28019000  | 1.16091300  |
| C | -1.93199800 | -0.05717400 | 0.20916800  |
| H | -1.18619100 | -0.54014200 | -0.44334800 |
| H | -1.49096900 | 0.86933900  | 0.61224500  |
| H | -2.13618400 | -0.74413300 | 1.06614400  |
| C | -3.69786300 | -0.96480700 | -1.10895400 |
| H | -4.59218100 | -0.72429600 | -1.70711200 |
| H | -2.96069500 | -1.45103000 | -1.76892100 |
| H | -3.99429400 | -1.69763600 | -0.32061500 |

### **S8-MP2/cc-pVTZ**

|   |             |             |             |
|---|-------------|-------------|-------------|
| C | 1.40357600  | 0.38313600  | 0.32099800  |
| C | 1.68768100  | -0.33347400 | -0.84598500 |
| C | 1.69644800  | -1.71661100 | -0.88954000 |
| C | 1.41047000  | -2.42525500 | 0.27465000  |
| C | 1.12101300  | -1.75652600 | 1.46161500  |
| C | 1.12292100  | -0.37275900 | 1.46379800  |
| C | 1.37538000  | 1.80151500  | 0.33814600  |
| C | 1.34004000  | 3.01734900  | 0.35009500  |
| F | 1.94536100  | 0.35765100  | -1.96157100 |
| F | 0.83139300  | 0.27988900  | 2.59414300  |
| H | 1.91894500  | -2.21429200 | -1.82140600 |
| H | 1.41230600  | -3.50555600 | 0.25662500  |
| H | 0.89365000  | -2.28575500 | 2.37479200  |
| H | 1.31532700  | 4.07864000  | 0.36233900  |
| N | -3.12782400 | -0.20412400 | -0.74279300 |
| C | -3.82963300 | 1.06118100  | -0.84910800 |
| H | -3.38038300 | 1.66548900  | -1.63538400 |
| H | -4.87327800 | 0.88433800  | -1.10422700 |
| H | -3.79564200 | 1.63696600  | 0.09012400  |
| C | -1.73208700 | 0.03091200  | -0.42576300 |
| H | -1.20409100 | -0.92009600 | -0.35981700 |

|   |             |             |             |
|---|-------------|-------------|-------------|
| H | -1.26851000 | 0.62959900  | -1.20926000 |
| H | -1.60497500 | 0.56402500  | 0.53145100  |
| C | -3.73429700 | -1.02210200 | 0.29022000  |
| H | -4.77743700 | -1.21477600 | 0.04457000  |
| H | -3.21389500 | -1.97643000 | 0.35574200  |
| H | -3.69569100 | -0.53986400 | 1.28079400  |

**S8- $\omega$ B97X-D/cc-pVTZ**

|   |             |             |             |
|---|-------------|-------------|-------------|
| C | 1.44658300  | 0.38963300  | 0.32814000  |
| C | 1.72463300  | -0.32023800 | -0.83881100 |
| C | 1.72614600  | -1.69795500 | -0.89122300 |
| C | 1.43855200  | -2.40712200 | 0.26368300  |
| C | 1.15430900  | -1.74996200 | 1.45002500  |
| C | 1.16352500  | -0.37149500 | 1.46112600  |
| C | 1.42278500  | 1.81107600  | 0.35407000  |
| C | 1.38982100  | 3.00699800  | 0.37288800  |
| F | 1.98596100  | 0.36859000  | -1.94626100 |
| F | 0.87797600  | 0.26728300  | 2.59228900  |
| H | 1.94466600  | -2.19205100 | -1.82574800 |
| H | 1.43344800  | -3.48739400 | 0.23828000  |
| H | 0.92364600  | -2.28517100 | 2.35867300  |
| H | 1.36512900  | 4.06853400  | 0.39090400  |
| N | -3.16259100 | -0.19493200 | -0.70862400 |
| C | -3.87710200 | 1.05344000  | -0.86050100 |
| H | -3.42561600 | 1.64455500  | -1.65755300 |
| H | -4.91581500 | 0.85771000  | -1.12840000 |
| H | -3.86976000 | 1.66146900  | 0.06127800  |
| C | -1.76401700 | 0.03228300  | -0.42041000 |
| H | -1.23738700 | -0.92102100 | -0.35972200 |
| H | -1.30718500 | 0.62264400  | -1.21527900 |
| H | -1.60745800 | 0.57014600  | 0.53129900  |
| C | -3.77425800 | -1.03278900 | 0.29880300  |

|   |             |             |            |
|---|-------------|-------------|------------|
| H | -4.81308000 | -1.23437600 | 0.03575500 |
| H | -3.24747700 | -1.98572800 | 0.35855300 |
| H | -3.75866700 | -0.57105900 | 1.30201300 |

**S8-B2PLYP-D/cc-pVTZ**

|   |             |             |             |
|---|-------------|-------------|-------------|
| C | 1.41402300  | 0.39208600  | 0.34736600  |
| C | 1.70023000  | -0.32966400 | -0.81608600 |
| C | 1.70380600  | -1.71109300 | -0.86124000 |
| C | 1.40881500  | -2.41738700 | 0.30027300  |
| C | 1.11477000  | -1.74894200 | 1.48445200  |
| C | 1.12252500  | -0.36686800 | 1.48551100  |
| C | 1.39212200  | 1.81055000  | 0.36469000  |
| C | 1.36382700  | 3.01637000  | 0.37682000  |
| F | 1.96681000  | 0.35662600  | -1.93392800 |
| F | 0.82411100  | 0.28262000  | 2.61715800  |
| H | 1.92824400  | -2.20832100 | -1.79182000 |
| H | 1.40544500  | -3.49688600 | 0.28188800  |
| H | 0.87813500  | -2.27614200 | 2.39535800  |
| H | 1.34345400  | 4.07672000  | 0.38900400  |
| N | -3.11739500 | -0.19903500 | -0.75735000 |
| C | -3.82809800 | 1.05903300  | -0.89560100 |
| H | -3.35449700 | 1.66613400  | -1.66625300 |
| H | -4.86020500 | 0.86992600  | -1.18919100 |
| H | -3.83671800 | 1.63942900  | 0.04280000  |
| C | -1.72855600 | 0.03602800  | -0.40825900 |
| H | -1.19973100 | -0.91367000 | -0.33727600 |
| H | -1.24969400 | 0.64214000  | -1.17646900 |
| H | -1.62197700 | 0.56233600  | 0.55554200  |
| C | -3.75577500 | -1.03933900 | 0.23878300  |
| H | -4.78784900 | -1.23617500 | -0.04979500 |
| H | -3.22891800 | -1.99049900 | 0.30989300  |
| H | -3.76013900 | -0.57290700 | 1.23897600  |



**S8-B2PLYP-D3/cc-pVTZ**

|   |             |             |             |
|---|-------------|-------------|-------------|
| C | 1.45236900  | 0.39492900  | 0.36279200  |
| C | 1.75659800  | -0.32915200 | -0.79402500 |
| C | 1.78272000  | -1.71011000 | -0.82945800 |
| C | 1.49350600  | -2.41274200 | 0.33508600  |
| C | 1.18333800  | -1.74173600 | 1.51299100  |
| C | 1.16862100  | -0.36023300 | 1.50482100  |
| C | 1.41048200  | 1.81252700  | 0.37112300  |
| C | 1.36482600  | 3.01762400  | 0.37559700  |
| F | 2.02078500  | 0.35540000  | -1.91334000 |
| F | 0.85810200  | 0.29357700  | 2.63056000  |
| H | 2.02081000  | -2.21060600 | -1.75465200 |
| H | 1.50804000  | -3.49206800 | 0.32411500  |
| H | 0.95210600  | -2.26720300 | 2.42604400  |
| H | 1.32943300  | 4.07723000  | 0.38112900  |
| N | -3.17401500 | -0.19467900 | -0.77240300 |
| C | -3.87333400 | 1.06900800  | -0.91368900 |
| H | -3.39134100 | 1.67286300  | -1.68075900 |
| H | -4.90382800 | 0.88964200  | -1.21645800 |
| H | -3.88703500 | 1.65208800  | 0.02210200  |
| C | -1.78214200 | 0.02066800  | -0.42365500 |
| H | -1.26514800 | -0.93562600 | -0.36176100 |
| H | -1.29619900 | 0.62382200  | -1.18886500 |
| H | -1.66259100 | 0.53834900  | 0.54240700  |
| C | -3.82618400 | -1.04156500 | 0.20858200  |
| H | -4.85690500 | -1.22750800 | -0.08940000 |
| H | -3.31011200 | -1.99851500 | 0.27035900  |
| H | -3.83613500 | -0.59291300 | 1.21600500  |

**Optimized coordinates of various structures of DFPHA-TEA complex calculated at MP2/cc-pVDZ level of theory.**

**S9**

|   |             |             |             |
|---|-------------|-------------|-------------|
| C | -2.43997900 | -0.00899300 | -0.00072900 |
| C | -3.19153000 | -1.20302400 | -0.00053500 |
| C | -4.58796400 | -1.21152100 | 0.00015100  |
| C | -5.27393000 | 0.01398600  | 0.00072700  |
| C | -4.56823200 | 1.22824900  | 0.00063400  |
| C | -3.17212400 | 1.19708400  | -0.00008900 |
| C | -1.00787700 | -0.01979200 | -0.00141900 |
| C | 0.22894700  | -0.02678500 | -0.00199400 |
| F | -2.52648500 | -2.37247700 | -0.00101900 |
| F | -2.48815400 | 2.35565700  | -0.00012700 |
| H | -5.11461200 | -2.16917900 | 0.00024800  |
| H | -6.36793800 | 0.02283000  | 0.00127100  |
| H | -5.07929600 | 2.19431200  | 0.00110000  |
| H | 1.32003700  | -0.02789900 | -0.00199300 |
| N | 3.46074100  | 0.00409100  | 0.00051000  |
| C | 3.95752300  | -0.96700800 | 0.99185300  |
| H | 5.03555300  | -0.78097700 | 1.20731800  |
| H | 3.89710300  | -1.97113800 | 0.54198300  |
| C | 3.91605100  | 1.36073600  | 0.35432600  |
| H | 4.99606500  | 1.48197000  | 0.10516900  |
| H | 3.83297100  | 1.47128300  | 1.44757600  |
| C | 3.94895100  | -0.35532700 | -1.34301100 |
| H | 3.85494000  | 0.53418600  | -1.98661600 |
| H | 5.03492900  | -0.60502500 | -1.30481100 |
| C | 3.15781500  | -1.49763400 | -1.97767300 |
| H | 3.55613600  | -1.71804800 | -2.98249200 |
| H | 3.21716800  | -2.42590700 | -1.38716700 |

|   |            |             |             |
|---|------------|-------------|-------------|
| H | 2.09534000 | -1.22334400 | -2.07717600 |
| C | 3.14432800 | -0.96658700 | 2.28501600  |
| H | 3.55053300 | -1.71651300 | 2.98466500  |
| H | 3.17023900 | 0.00985700  | 2.79474200  |
| H | 2.09124100 | -1.21715900 | 2.07959000  |
| C | 3.08643300 | 2.45961900  | -0.30747500 |
| H | 3.46380100 | 3.45021800  | -0.00215300 |
| H | 3.13233800 | 2.41289900  | -1.40731900 |
| H | 2.02954500 | 2.38236100  | -0.00589700 |

-----

**S10**

|   |             |             |             |
|---|-------------|-------------|-------------|
| C | -3.11087700 | 0.00501600  | 0.00106300  |
| C | -2.45291100 | 1.25285000  | -0.00906400 |
| C | -1.06139600 | 1.36418200  | -0.02076300 |
| C | -0.28058600 | 0.19591400  | -0.02295800 |
| C | -0.89891200 | -1.06660400 | -0.01400600 |
| C | -2.29278900 | -1.14385200 | -0.00186200 |
| C | -4.54108700 | -0.09042300 | 0.01309400  |
| C | -5.77187900 | -0.17311400 | 0.02333800  |
| F | -3.20682800 | 2.36813200  | -0.00734200 |
| F | -2.89087200 | -2.34988300 | 0.00675400  |
| H | -0.60949800 | 2.35978300  | -0.02949100 |
| H | 0.81520300  | 0.25468400  | -0.02786700 |
| H | -0.31388100 | -1.99059500 | -0.01905500 |
| H | -6.84527200 | -0.24483200 | 0.03238200  |
| N | 3.13357200  | -0.03846100 | 0.00126200  |
| C | 3.48470400  | -1.04933900 | 1.01222000  |
| H | 4.57539700  | -1.01108300 | 1.24132700  |
| H | 3.29317200  | -2.04462600 | 0.57879600  |
| C | 3.77699900  | 1.24584900  | 0.32186100  |

|   |            |             |             |
|---|------------|-------------|-------------|
| H | 4.85192300 | 1.22935400  | 0.02625500  |
| H | 3.75677700 | 1.37471000  | 1.41630100  |
| C | 3.54811200 | -0.49104800 | -1.33676500 |
| H | 3.58781000 | 0.39153000  | -1.99618600 |
| H | 4.58211200 | -0.90767600 | -1.30509900 |
| C | 2.58130900 | -1.50570200 | -1.94458000 |
| H | 2.93105900 | -1.81069800 | -2.94543200 |
| H | 2.49735700 | -2.41840100 | -1.33221200 |
| H | 1.57577700 | -1.06660700 | -2.04533200 |
| C | 2.66308400 | -0.91137500 | 2.29255100  |
| H | 2.95307200 | -1.69189900 | 3.01627800  |
| H | 2.81438900 | 0.06538700  | 2.77995600  |
| H | 1.58854200 | -1.01881400 | 2.07308400  |
| C | 3.06410100 | 2.43468400  | -0.31945600 |
| H | 3.58420900 | 3.37426300  | -0.06694700 |
| H | 3.03124700 | 2.35636800  | -1.41815500 |
| H | 2.02766100 | 2.50192100  | 0.04982100  |

-----

**S11**

|   |             |             |             |
|---|-------------|-------------|-------------|
| C | 2.63726400  | -0.22571800 | -0.01464400 |
| C | 1.22933700  | -0.30267600 | -0.03409800 |
| C | 0.40603600  | 0.82481900  | -0.06283400 |
| C | 1.01488300  | 2.09126900  | -0.06785300 |
| C | 2.41382100  | 2.22303600  | -0.04843000 |
| C | 3.19866500  | 1.06860700  | -0.02158800 |
| C | 3.45760900  | -1.40090600 | 0.01196600  |
| C | 4.16394200  | -2.41216500 | 0.03338100  |
| F | 0.66477200  | -1.53030500 | -0.03247600 |
| F | 4.53966200  | 1.18019700  | -0.00257500 |
| H | -0.68259200 | 0.68534200  | -0.06972300 |

|   |             |             |             |
|---|-------------|-------------|-------------|
| H | 0.38890500  | 2.98905800  | -0.08689700 |
| H | 2.90451000  | 3.19975000  | -0.05240200 |
| H | 4.78015800  | -3.29383200 | 0.05318000  |
| N | -2.80150000 | -0.18047200 | 0.02887600  |
| C | -2.75222800 | -1.41900600 | -0.76654500 |
| H | -3.78005500 | -1.82836400 | -0.90995300 |
| H | -2.19156100 | -2.16810300 | -0.18460500 |
| C | -3.83441200 | 0.72790500  | -0.49303900 |
| H | -4.84824700 | 0.40140400  | -0.16346100 |
| H | -3.82782600 | 0.66182000  | -1.59282300 |
| C | -3.08625800 | -0.50766200 | 1.43737500  |
| H | -3.48734100 | 0.39681800  | 1.92406300  |
| H | -3.88990400 | -1.27839400 | 1.49759400  |
| C | -1.84798300 | -0.96499400 | 2.20629500  |
| H | -2.12690500 | -1.25060800 | 3.23485400  |
| H | -1.36012200 | -1.83155200 | 1.73387400  |
| H | -1.10671500 | -0.15176400 | 2.26077300  |
| C | -2.05566700 | -1.24229900 | -2.11422800 |
| H | -2.05109000 | -2.20084700 | -2.66029800 |
| H | -2.55934300 | -0.50011900 | -2.75425500 |
| H | -1.01203500 | -0.92588200 | -1.96729100 |
| C | -3.58251500 | 2.18031400  | -0.09280400 |
| H | -4.37670500 | 2.83329500  | -0.49300200 |
| H | -3.56281100 | 2.31065900  | 1.00138500  |
| H | -2.61469000 | 2.52245700  | -0.49540400 |

-----  
**S12**

|   |             |            |             |
|---|-------------|------------|-------------|
| C | -1.31393800 | 0.64105100 | 0.61099200  |
| C | -1.79296000 | 1.01428900 | -0.66158100 |
| C | -2.61839400 | 0.18722900 | -1.42630000 |

|   |             |             |             |
|---|-------------|-------------|-------------|
| C | -3.00195200 | -1.05874100 | -0.90283200 |
| C | -2.55259300 | -1.47100500 | 0.36247700  |
| C | -1.72653300 | -0.61682500 | 1.09544000  |
| C | -0.50869600 | 1.52558000  | 1.39809800  |
| C | 0.17102400  | 2.29994300  | 2.07760700  |
| F | -1.43808600 | 2.21933800  | -1.14634300 |
| F | -1.30299300 | -0.99959600 | 2.31577600  |
| H | -2.95689900 | 0.53225000  | -2.40665600 |
| H | -3.65097600 | -1.71648000 | -1.48868400 |
| H | -2.83736200 | -2.43482200 | 0.79207000  |
| H | 0.75770900  | 2.97499600  | 2.67602100  |
| N | 1.88093100  | -0.41137100 | -0.40372700 |
| C | 2.49651700  | -1.29319300 | 0.60074400  |
| H | 3.59486500  | -1.38193700 | 0.41946200  |
| H | 2.07821700  | -2.30426800 | 0.46563600  |
| C | 2.70784300  | 0.79315400  | -0.56478300 |
| H | 3.68555900  | 0.53978200  | -1.04286800 |
| H | 2.94020400  | 1.16981400  | 0.44483000  |
| C | 1.77010800  | -1.12994400 | -1.68107800 |
| H | 1.63323300  | -0.38586500 | -2.48175800 |
| H | 2.71564300  | -1.67571000 | -1.91523000 |
| C | 0.57716500  | -2.08326400 | -1.70874400 |
| H | 0.49018200  | -2.56011400 | -2.70036800 |
| H | 0.66756200  | -2.88779800 | -0.96061900 |
| H | -0.34839300 | -1.52605400 | -1.49923800 |
| C | 2.22873900  | -0.85489900 | 2.03889200  |
| H | 2.70272400  | -1.56353600 | 2.73986500  |
| H | 2.63524800  | 0.14647200  | 2.25267300  |
| H | 1.14732900  | -0.83113900 | 2.23631200  |
| C | 2.01571600  | 1.91128800  | -1.34198000 |

|   |            |            |             |
|---|------------|------------|-------------|
| H | 2.64465500 | 2.81791100 | -1.32787100 |
| H | 1.84663200 | 1.64987200 | -2.39893400 |
| H | 1.04477800 | 2.15058200 | -0.88517400 |

---

**S13**

|   |             |             |             |
|---|-------------|-------------|-------------|
| C | -1.75115400 | 0.49157400  | -0.42606900 |
| C | -0.86674000 | -0.27070500 | -1.21720800 |
| C | -0.89471600 | -1.66731700 | -1.23060400 |
| C | -1.83892300 | -2.33573900 | -0.43440500 |
| C | -2.74090100 | -1.61617000 | 0.36732000  |
| C | -2.68315700 | -0.22144600 | 0.35703600  |
| C | -1.72719800 | 1.92407000  | -0.43231500 |
| C | -1.70548900 | 3.15797200  | -0.43172200 |
| F | 0.00995700  | 0.38140800  | -2.00004200 |
| F | -3.54180600 | 0.48098400  | 1.11796100  |
| H | -0.19068300 | -2.20997300 | -1.86514200 |
| H | -1.87186300 | -3.42950400 | -0.43797300 |
| H | -3.48362600 | -2.11500900 | 0.99508000  |
| H | -1.69141100 | 4.23396100  | -0.43740400 |
| N | 2.08469000  | -0.02766800 | 0.49827300  |
| C | 1.89054800  | -0.93311100 | 1.64007100  |
| H | 2.67886300  | -0.76608700 | 2.41323600  |
| H | 2.02637800  | -1.96575200 | 1.27585700  |
| C | 2.32333700  | 1.34198700  | 0.97696600  |
| H | 3.33976900  | 1.43142700  | 1.43097100  |
| H | 1.60145600  | 1.54637300  | 1.78447700  |
| C | 3.22887400  | -0.49144700 | -0.30152500 |
| H | 3.62397700  | 0.36506000  | -0.87087700 |
| H | 4.05783300  | -0.83816900 | 0.35962600  |
| C | 2.83703500  | -1.58533900 | -1.29263400 |

|   |             |             |             |
|---|-------------|-------------|-------------|
| H | 3.72043800  | -1.93081100 | -1.85662200 |
| H | 2.39952700  | -2.46126600 | -0.78542400 |
| H | 2.09481800  | -1.18911200 | -2.00238800 |
| C | 0.50097300  | -0.82451100 | 2.26321300  |
| H | 0.39896200  | -1.54934600 | 3.08919200  |
| H | 0.30452500  | 0.17794200  | 2.67663000  |
| H | -0.26842000 | -1.04080500 | 1.50799100  |
| C | 2.13012500  | 2.39267200  | -0.11487400 |
| H | 2.25065800  | 3.40386600  | 0.31039000  |
| H | 2.86458000  | 2.28827100  | -0.92984400 |
| H | 1.12234600  | 2.30614200  | -0.54646100 |

---

**S14**

|   |             |             |             |
|---|-------------|-------------|-------------|
| C | -1.67472600 | 0.72299900  | 0.01689700  |
| C | -1.87947900 | 0.00699900  | 1.21417300  |
| C | -2.27262000 | -1.33258300 | 1.22846000  |
| C | -2.47279500 | -1.99252500 | 0.00464500  |
| C | -2.27425700 | -1.32093300 | -1.21343200 |
| C | -1.88310900 | 0.01922800  | -1.18741300 |
| C | -1.29107500 | 2.10301400  | 0.02175500  |
| C | -0.94365400 | 3.28731100  | 0.02069400  |
| F | -1.66587900 | 0.64689300  | 2.37833600  |
| F | -1.68084000 | 0.67274400  | -2.34520800 |
| H | -2.41364100 | -1.83693100 | 2.18782600  |
| H | -2.78071800 | -3.04245800 | -0.00024500 |
| H | -2.41834400 | -1.81594300 | -2.17723300 |
| H | -0.65720600 | 4.32467000  | 0.02175500  |
| N | 2.18072800  | -0.32059800 | -0.01474900 |
| C | 1.97506500  | 0.64493100  | 1.07531700  |
| H | 0.91263800  | 0.66625400  | 1.40563300  |



|   |            |             |             |
|---|------------|-------------|-------------|
| H | 2.19596000 | 1.65356600  | 0.68749900  |
| C | 1.41859500 | -1.55109500 | 0.23713900  |
| H | 0.34834500 | -1.42873200 | -0.04137300 |
| H | 1.43781400 | -1.74582900 | 1.32327100  |
| C | 1.81212000 | 0.26440700  | -1.31241300 |
| H | 1.62147600 | -0.56311300 | -2.01699400 |
| H | 0.86611800 | 0.84507900  | -1.24550300 |
| C | 2.93001900 | 1.13727700  | -1.87846400 |
| H | 2.64707800 | 1.53913400  | -2.86641600 |
| H | 3.15062300 | 1.99390400  | -1.22032300 |
| H | 3.85248300 | 0.54367700  | -1.98369200 |
| C | 2.89540500 | 0.36110000  | 2.26057100  |
| H | 2.74441800 | 1.10749200  | 3.05923800  |
| H | 2.70607000 | -0.63500300 | 2.69400200  |
| H | 3.94731800 | 0.39358700  | 1.93392600  |
| C | 2.02122400 | -2.75618600 | -0.48194600 |
| H | 1.45068300 | -3.67207300 | -0.24992700 |
| H | 2.01263000 | -2.62625200 | -1.57675400 |
| H | 3.06735400 | -2.89723100 | -0.16549700 |

-----

**S15**

|   |             |             |             |
|---|-------------|-------------|-------------|
| C | -1.79907000 | -0.49545400 | 0.59157800  |
| C | -2.10904300 | 0.86279300  | 0.80937200  |
| C | -2.45183000 | 1.72914800  | -0.23029400 |
| C | -2.49349400 | 1.22965500  | -1.54305600 |
| C | -2.19051500 | -0.11643500 | -1.80726200 |
| C | -1.85185100 | -0.95277600 | -0.74080600 |
| C | -1.43321100 | -1.36382400 | 1.67014300  |
| C | -1.10095500 | -2.11421200 | 2.59177300  |
| F | -2.04408200 | 1.33291200  | 2.06752700  |

|   |             |             |             |
|---|-------------|-------------|-------------|
| F | -1.54271600 | -2.23942900 | -0.98345400 |
| H | -2.67867700 | 2.77360100  | -0.00126100 |
| H | -2.76058300 | 1.89662900  | -2.36828900 |
| H | -2.21427100 | -0.52723200 | -2.81987300 |
| H | -0.82211000 | -2.76851700 | 3.39935600  |
| N | 2.31235700  | 0.25077600  | -0.28698300 |
| C | 1.81457200  | -1.09332100 | -0.61580500 |
| H | 0.95846600  | -1.37742900 | 0.03737200  |
| H | 2.61880600  | -1.81798700 | -0.40484000 |
| C | 1.18836100  | 1.17231400  | -0.07358800 |
| H | 0.76431100  | 1.05704400  | 0.95134900  |
| H | 0.38311900  | 0.89851200  | -0.77481600 |
| C | 3.16834100  | 0.20717200  | 0.90536800  |
| H | 3.22310900  | 1.22740000  | 1.32115000  |
| H | 2.71648900  | -0.43238000 | 1.70011100  |
| C | 4.58593600  | -0.25925700 | 0.58013800  |
| H | 5.21693700  | -0.24335800 | 1.48513500  |
| H | 4.60036900  | -1.28688600 | 0.18190100  |
| H | 5.03209700  | 0.40501000  | -0.17729400 |
| C | 1.43058200  | -1.21080200 | -2.08929900 |
| H | 1.05596700  | -2.22376200 | -2.31335400 |
| H | 0.63775500  | -0.49422900 | -2.35979800 |
| H | 2.30793700  | -1.00110600 | -2.72239600 |
| C | 1.57929600  | 2.62593200  | -0.32943300 |
| H | 0.70741100  | 3.28915700  | -0.19418900 |
| H | 2.37000900  | 2.96782900  | 0.35871700  |
| H | 1.95481800  | 2.73532600  | -1.35974000 |

---

**S16**

|   |            |            |            |
|---|------------|------------|------------|
| C | 1.89755500 | 0.47401400 | 0.20695700 |
|---|------------|------------|------------|

|   |             |             |             |
|---|-------------|-------------|-------------|
| C | 1.55192100  | -0.04189500 | 1.47249900  |
| C | 1.59020000  | -1.40766800 | 1.76104900  |
| C | 1.99596400  | -2.30079800 | 0.75554400  |
| C | 2.34938300  | -1.83133700 | -0.52069600 |
| C | 2.29492500  | -0.45919000 | -0.77229700 |
| C | 1.83808300  | 1.87714000  | -0.07386000 |
| C | 1.77153900  | 3.08631300  | -0.31187800 |
| F | 1.15137000  | 0.82360000  | 2.42168100  |
| F | 2.60834900  | 0.00202900  | -1.99632500 |
| H | 1.30583400  | -1.75006600 | 2.75930700  |
| H | 2.03232500  | -3.37372000 | 0.96690500  |
| H | 2.66280300  | -2.50817600 | -1.31968100 |
| H | 1.72396900  | 4.14103500  | -0.52058500 |
| N | -2.32012000 | -0.00201000 | -0.37359000 |
| C | -1.15073000 | -0.57955100 | -1.05082200 |
| H | -0.50129500 | -1.12452700 | -0.32867100 |
| H | -0.54237700 | 0.24756900  | -1.45387600 |
| C | -2.86366100 | -0.96094400 | 0.59646700  |
| H | -2.25216500 | -0.97592600 | 1.53031700  |
| H | -2.78438800 | -1.96983700 | 0.15743300  |
| C | -1.95701600 | 1.25510400  | 0.29736300  |
| H | -2.72740600 | 1.46816800  | 1.05726400  |
| H | -0.99303400 | 1.15730500  | 0.84672800  |
| C | -1.90163500 | 2.42864500  | -0.67787300 |
| H | -1.66467100 | 3.36327200  | -0.14141300 |
| H | -1.12695600 | 2.28544200  | -1.44806500 |
| H | -2.87526800 | 2.54078100  | -1.18201600 |
| C | -1.54863000 | -1.49578700 | -2.20573500 |
| H | -0.65040900 | -1.89026300 | -2.71161000 |
| H | -2.14458000 | -2.35727500 | -1.86141600 |

|   |             |             |             |
|---|-------------|-------------|-------------|
| H | -2.15282400 | -0.93570500 | -2.93758200 |
| C | -4.33150600 | -0.68884000 | 0.91931400  |
| H | -4.72238600 | -1.44870100 | 1.61749300  |
| H | -4.47474800 | 0.29865000  | 1.38729300  |
| H | -4.92740300 | -0.71585400 | -0.00709300 |
